# Supplementary material for: Discovery of Flavone Derivatives Containing Carboxamide Fragments as Novel Antiviral Agents
Source: MDPI journal article supplement (doi:10.3390/molecules28052179), 2023-02-26
Supplement: s1 [file s1]

# Discovery of Flavone Derivatives Containing Carboxamide Fragments as Novel Antiviral Agents

Bobo Zhao <sup>1,†</sup>, Jiali Wang <sup>1,†</sup>, Lu Wang <sup>1</sup>, Ziwen Wang <sup>2,\*</sup> and Aidang Lu <sup>1,\*</sup>

<sup>1</sup> School of Chemical Engineering and Technology, Hebei University of Technology, Tianjin 300401, China

<sup>2</sup> Tianjin Key Laboratory of Structure and Performance for Functional Molecules, College of Chemistry, Tianjin Normal University, Tianjin 300387, China

\* Correspondence: hxywzw@tjnu.edu.cn (Z.W.); luaidang@hebut.edu.cn (A.L.); Tel.: +86-22-23766531 (Z.W.); +86-22-60202812 (A.L.)

† These authors contributed equally to this work.

## Contents

|                                                                                |    |
|--------------------------------------------------------------------------------|----|
| <b>Section S1: Phytotoxic Activity</b>                                         | 3  |
| <b>Section S2: Copies of NMR spectra (Figures S1–S60)</b>                      | 4  |
| <b>Figures S1–S2. <sup>1</sup>H NMR and <sup>13</sup>C NMR spectra of 2a</b>   | 4  |
| <b>Figures S3–S4. <sup>1</sup>H NMR and <sup>13</sup>C NMR spectra of 2b</b>   | 5  |
| <b>Figures S5–S6. <sup>1</sup>H NMR and <sup>13</sup>C NMR spectra of 2c</b>   | 6  |
| <b>Figures S7–S8. <sup>1</sup>H NMR and <sup>13</sup>C NMR spectra of 2d</b>   | 7  |
| <b>Figures S9–S10. <sup>1</sup>H NMR and <sup>13</sup>C NMR spectra of 2e</b>  | 8  |
| <b>Figures S11–S12. <sup>1</sup>H NMR and <sup>13</sup>C NMR spectra of 2f</b> | 9  |
| <b>Figures S13–S14. <sup>1</sup>H NMR and <sup>13</sup>C NMR spectra of 3</b>  | 10 |
| <b>Figures S15–S16. <sup>1</sup>H NMR and <sup>13</sup>C NMR spectra of 4a</b> | 11 |
| <b>Figures S17–S18. <sup>1</sup>H NMR and <sup>13</sup>C NMR spectra of 4b</b> | 12 |
| <b>Figures S19–S20. <sup>1</sup>H NMR and <sup>13</sup>C NMR spectra of 4c</b> | 13 |
| <b>Figures S21–S22. <sup>1</sup>H NMR and <sup>13</sup>C NMR spectra of 4d</b> | 14 |
| <b>Figures S23–S24. <sup>1</sup>H NMR and <sup>13</sup>C NMR spectra of 4e</b> | 15 |
| <b>Figures S25–S26. <sup>1</sup>H NMR and <sup>13</sup>C NMR spectra of 4f</b> | 16 |
| <b>Figures S27–S28. <sup>1</sup>H NMR and <sup>13</sup>C NMR spectra of 4g</b> | 18 |
| <b>Figures S29–S30. <sup>1</sup>H NMR and <sup>13</sup>C NMR spectra of 4h</b> | 18 |
| <b>Figures S31–S32. <sup>1</sup>H NMR and <sup>13</sup>C NMR spectra of 4i</b> | 19 |

---

|                         |                                                                                            |           |
|-------------------------|--------------------------------------------------------------------------------------------|-----------|
| <b>Figures S33–S34.</b> | <b><math>^1\text{H}</math> NMR and <math>^{13}\text{C}</math> NMR spectra of <b>4j</b></b> | <b>20</b> |
| <b>Figures S35–S36.</b> | <b><math>^1\text{H}</math> NMR and <math>^{13}\text{C}</math> NMR spectra of <b>4k</b></b> | <b>21</b> |
| <b>Figures S37–S38.</b> | <b><math>^1\text{H}</math> NMR and <math>^{13}\text{C}</math> NMR spectra of <b>4l</b></b> | <b>22</b> |
| <b>Figures S39–S40.</b> | <b><math>^1\text{H}</math> NMR and <math>^{13}\text{C}</math> NMR spectra of <b>4m</b></b> | <b>23</b> |
| <b>Figures S41–S42.</b> | <b><math>^1\text{H}</math> NMR and <math>^{13}\text{C}</math> NMR spectra of <b>4n</b></b> | <b>24</b> |
| <b>Figures S43–S44.</b> | <b><math>^1\text{H}</math> NMR and <math>^{13}\text{C}</math> NMR spectra of <b>5a</b></b> | <b>25</b> |
| <b>Figures S45–S46.</b> | <b><math>^1\text{H}</math> NMR and <math>^{13}\text{C}</math> NMR spectra of <b>5b</b></b> | <b>26</b> |
| <b>Figures S47–S48.</b> | <b><math>^1\text{H}</math> NMR and <math>^{13}\text{C}</math> NMR spectra of <b>5c</b></b> | <b>27</b> |
| <b>Figures S49–S50.</b> | <b><math>^1\text{H}</math> NMR and <math>^{13}\text{C}</math> NMR spectra of <b>5d</b></b> | <b>28</b> |
| <b>Figures S51–S52.</b> | <b><math>^1\text{H}</math> NMR and <math>^{13}\text{C}</math> NMR spectra of <b>5e</b></b> | <b>29</b> |
| <b>Figures S53–S54.</b> | <b><math>^1\text{H}</math> NMR and <math>^{13}\text{C}</math> NMR spectra of <b>6a</b></b> | <b>30</b> |
| <b>Figures S55–S56.</b> | <b><math>^1\text{H}</math> NMR and <math>^{13}\text{C}</math> NMR spectra of <b>6b</b></b> | <b>31</b> |
| <b>Figures S57–S58.</b> | <b><math>^1\text{H}</math> NMR and <math>^{13}\text{C}</math> NMR spectra of <b>6c</b></b> | <b>32</b> |
| <b>Figures S59–S60.</b> | <b><math>^1\text{H}</math> NMR and <math>^{13}\text{C}</math> NMR spectra of <b>6d</b></b> | <b>33</b> |
| <b>Section S3:</b>      | <b>Molecule docking results of <b>1</b> and <b>2a</b> with TMV CP (Figure S61).</b>        | <b>34</b> |

**Section S1. Phytotoxic Activity**

The growing 5–6 leaf stage tobaccos (*Nicotiana tabacum* var *Xanthi nc*) were selected. The compound solution (500 µg/mL) was smeared on the leaves and calculated the number of lesions after 0, 3, 7 and 10 days respectively. [7,51] There are three replicates for each compound.

## Section S3. Copies of NMR spectra (Figures S1–S60)

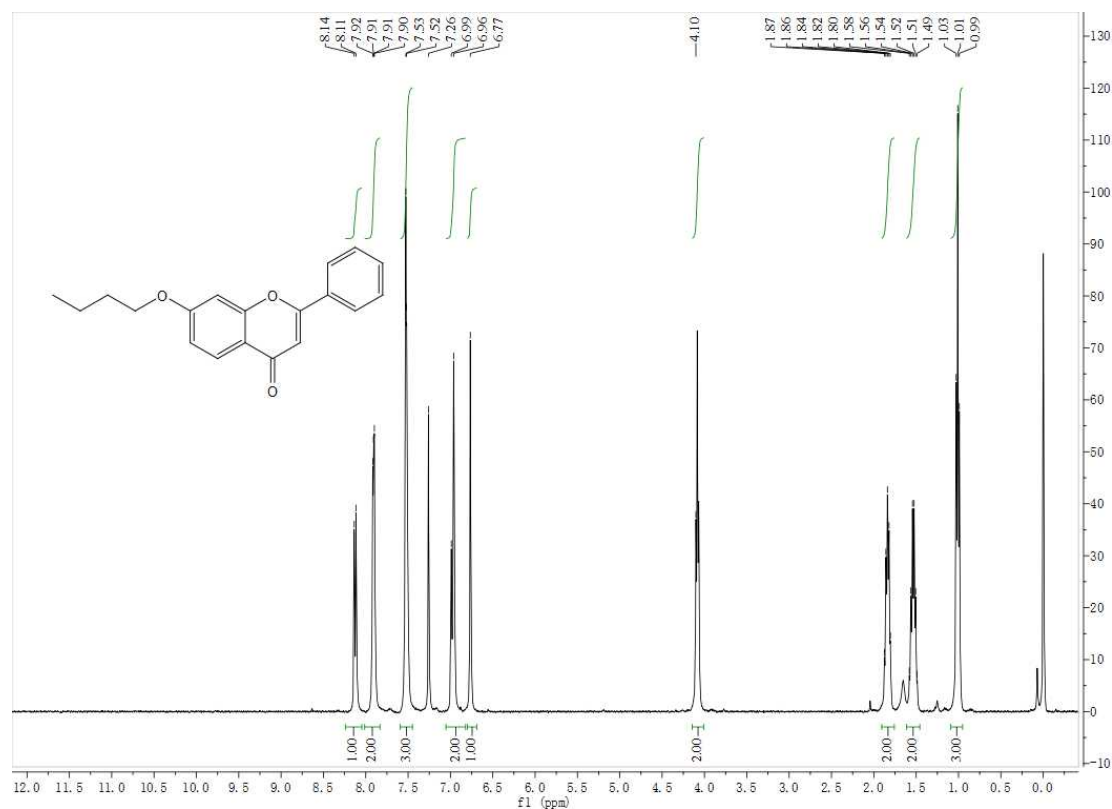Figure S1. <sup>1</sup>H NMR spectrum of 2a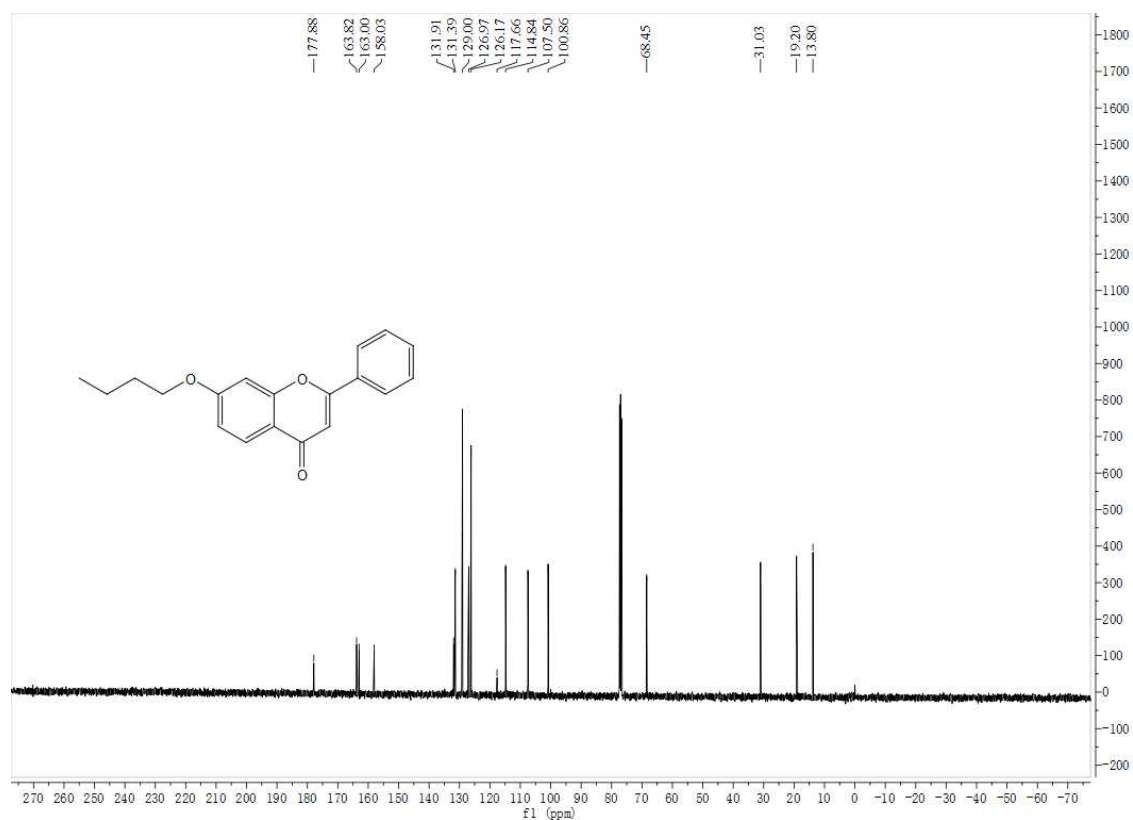Figure S2. <sup>13</sup>C NMR spectrum of 2a



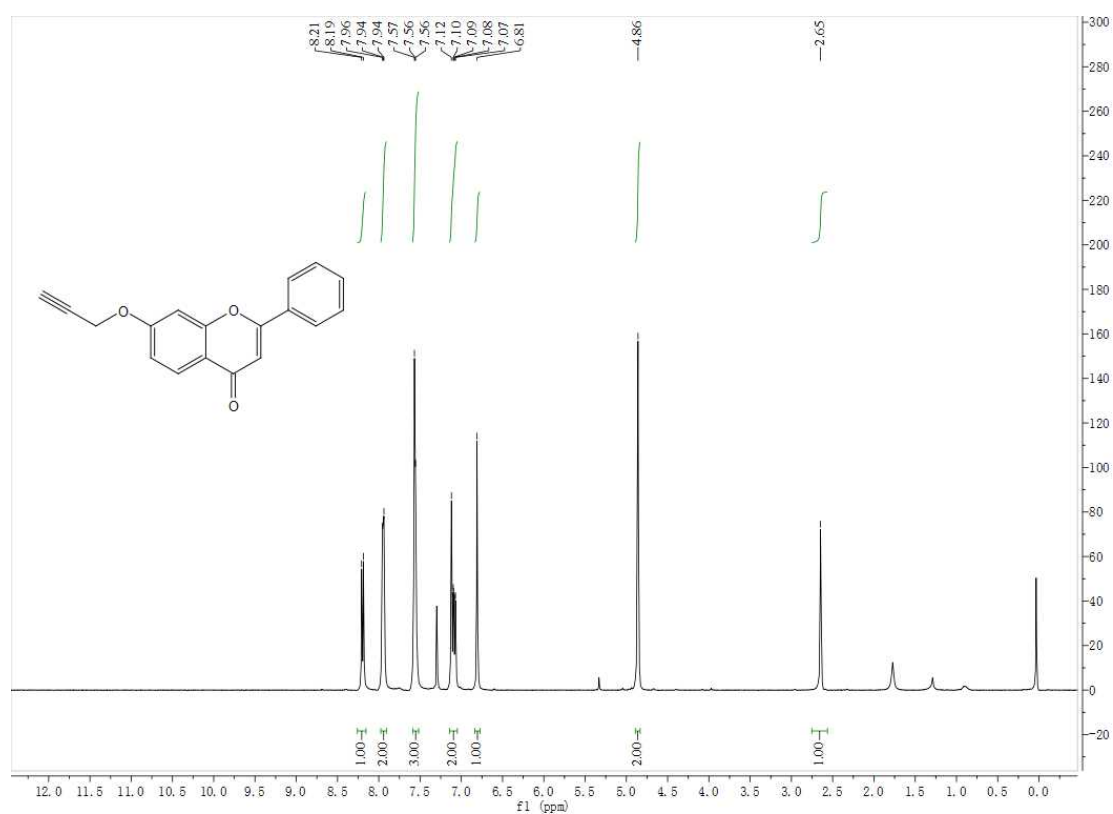Figure S3. <sup>1</sup>H NMR spectrum of 2b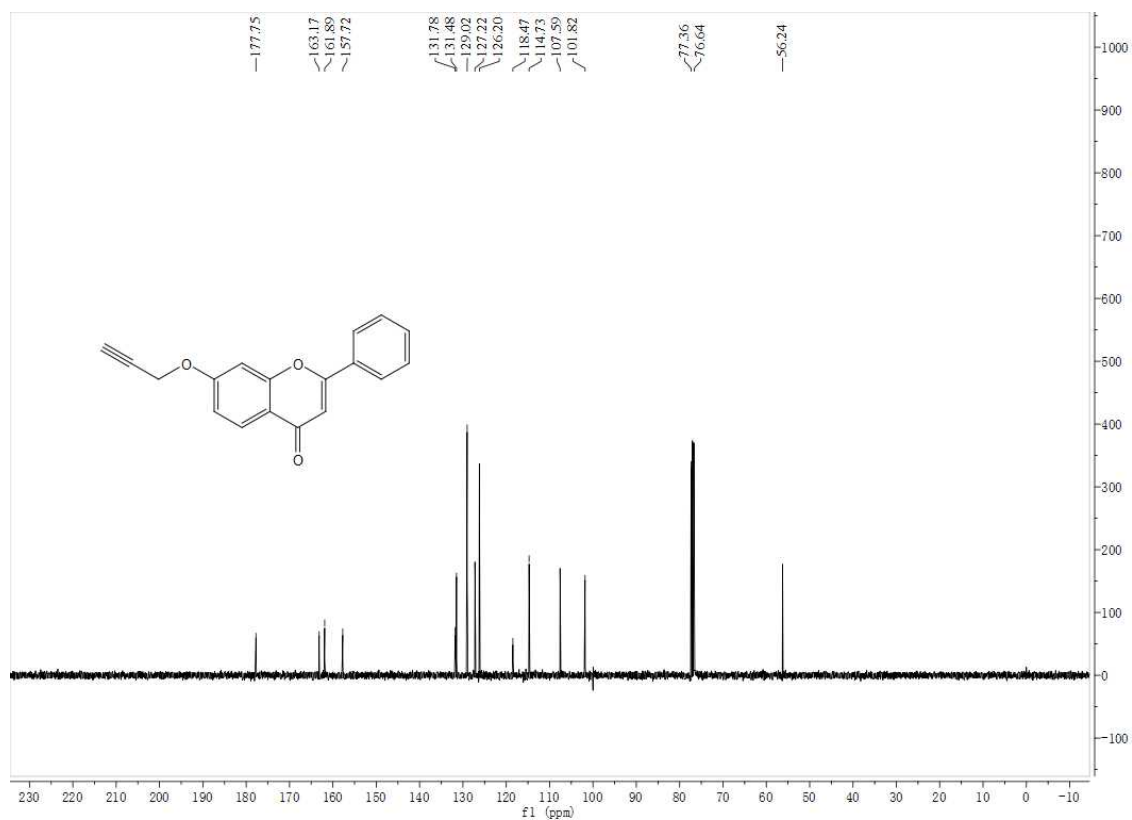Figure S4. <sup>13</sup>C NMR spectrum of 2b

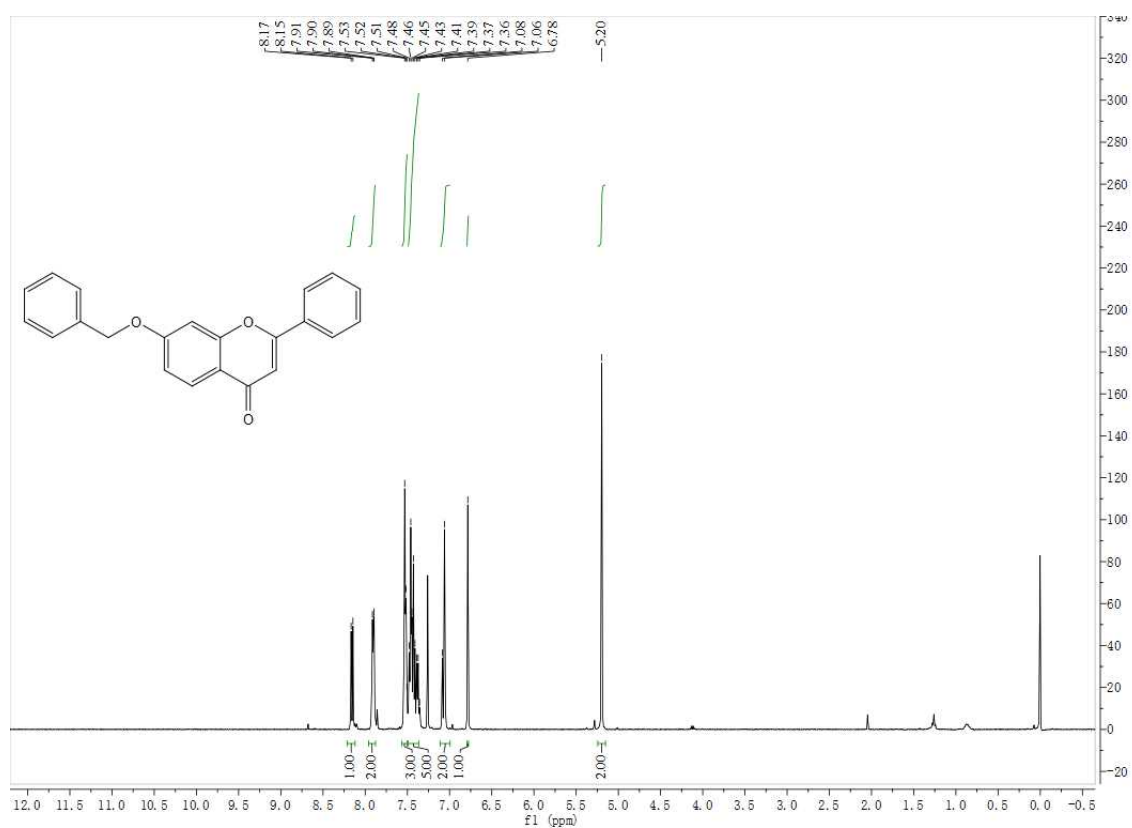Figure S5. <sup>1</sup>H NMR spectrum of 2c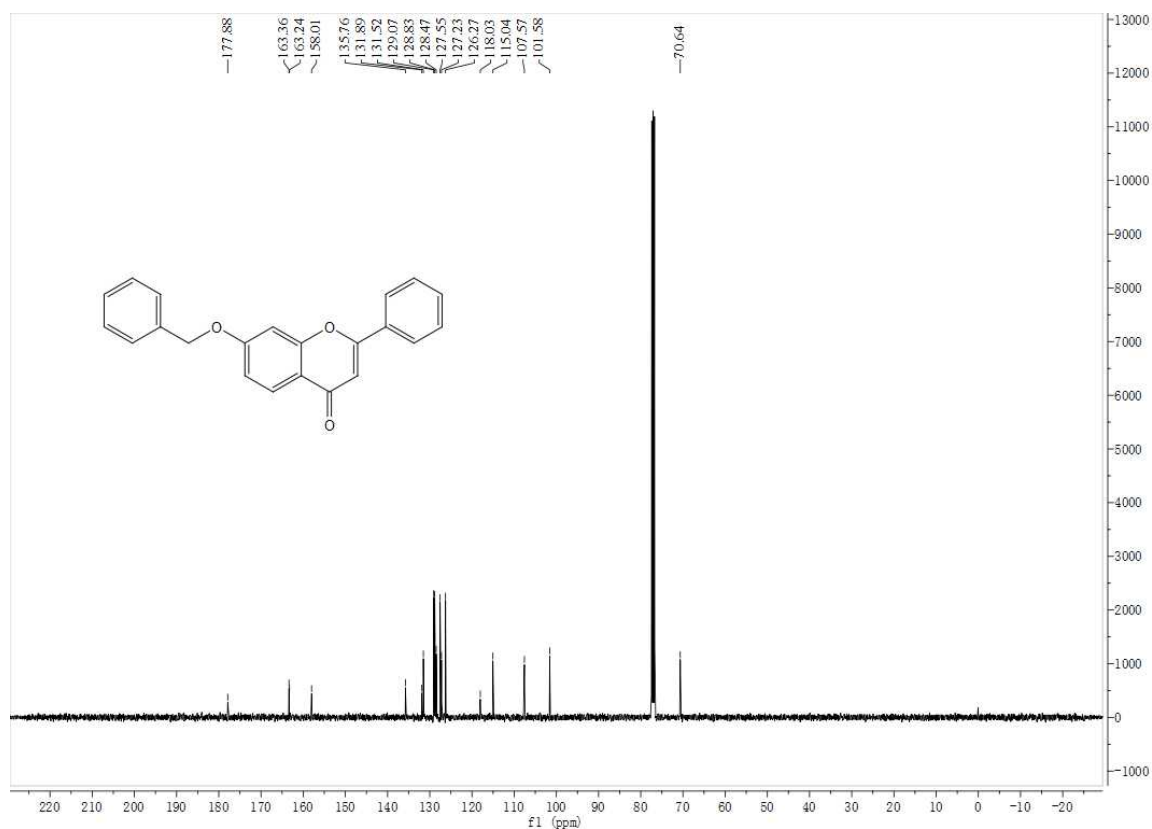Figure S6. <sup>13</sup>C NMR spectrum of 2c

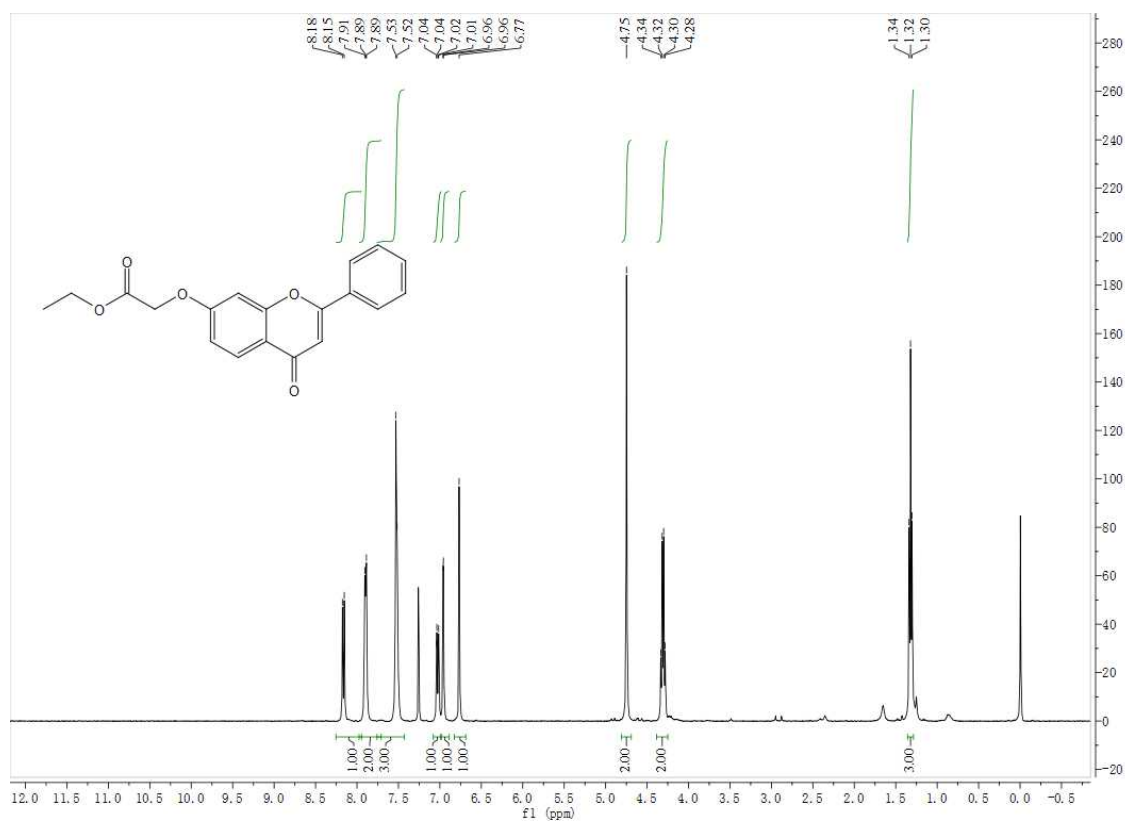Figure S7. <sup>1</sup>H NMR spectrum of 2d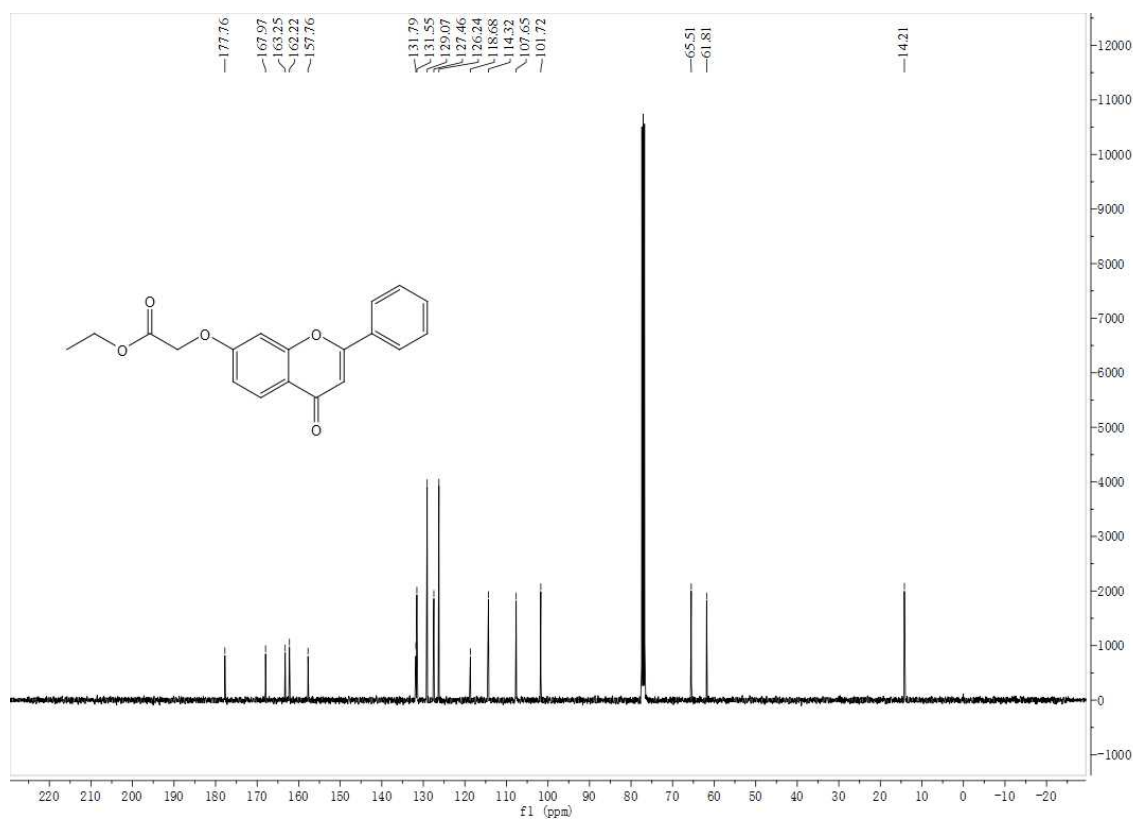Figure S8. <sup>13</sup>C NMR spectrum of 2d

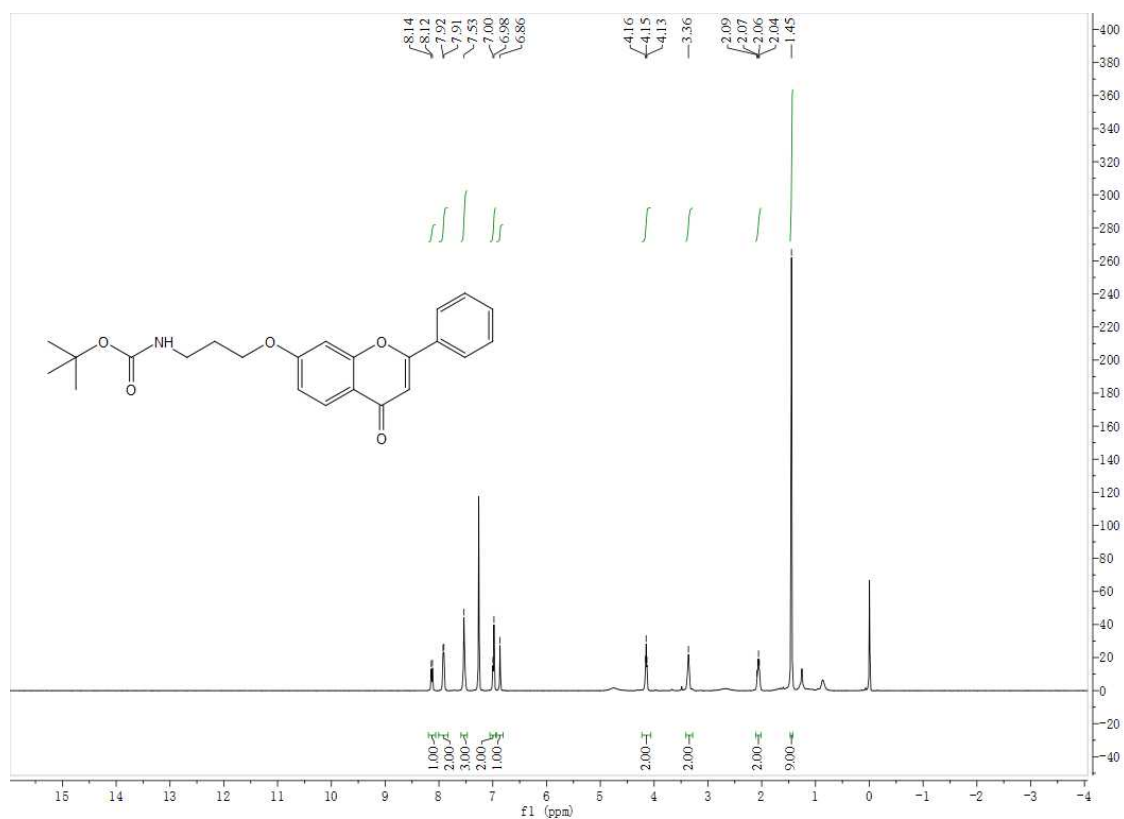Figure S9. <sup>1</sup>H NMR spectrum of 2e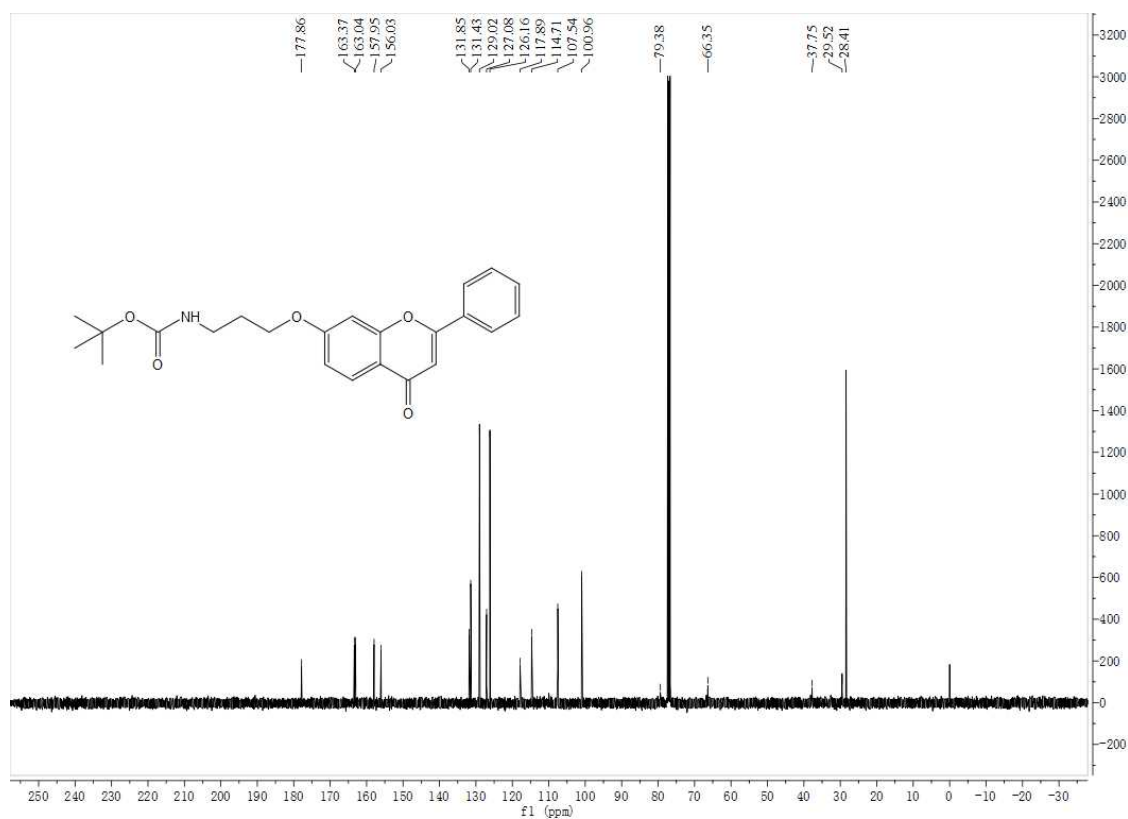Figure S10. <sup>13</sup>C NMR spectrum of 2e

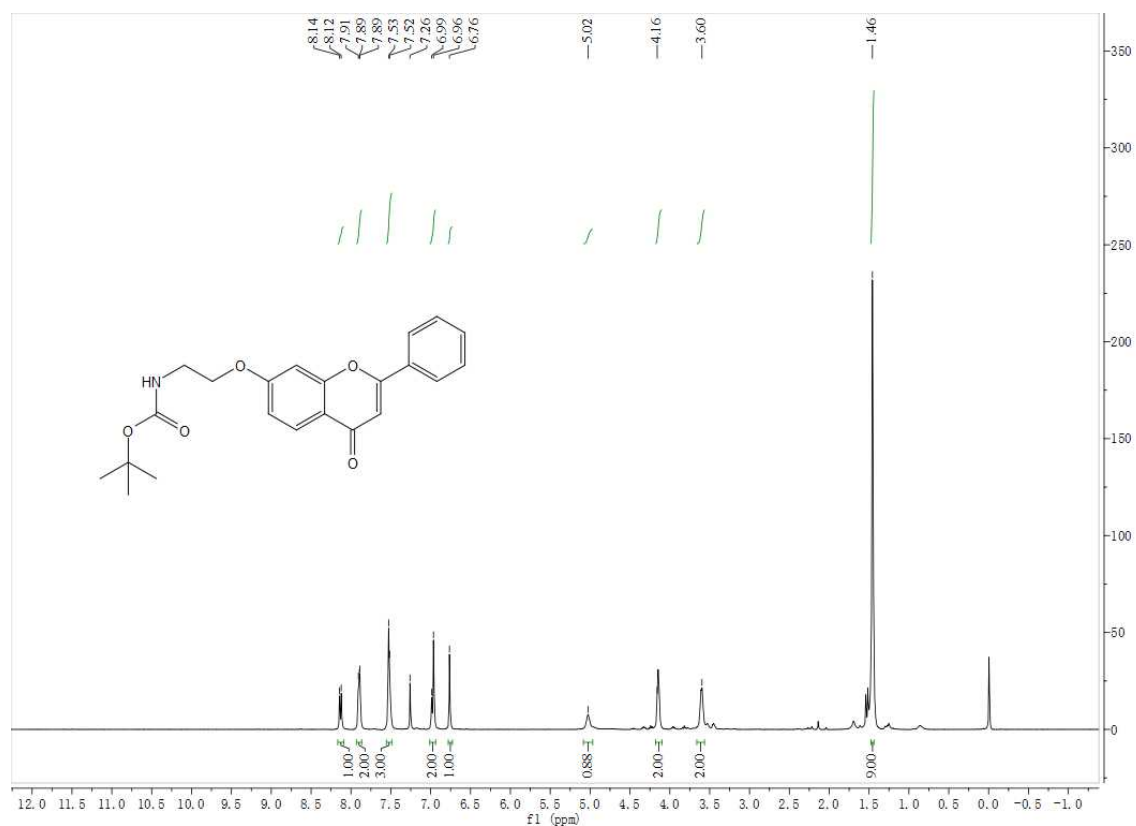Figure S11. <sup>1</sup>H NMR spectrum of **2f**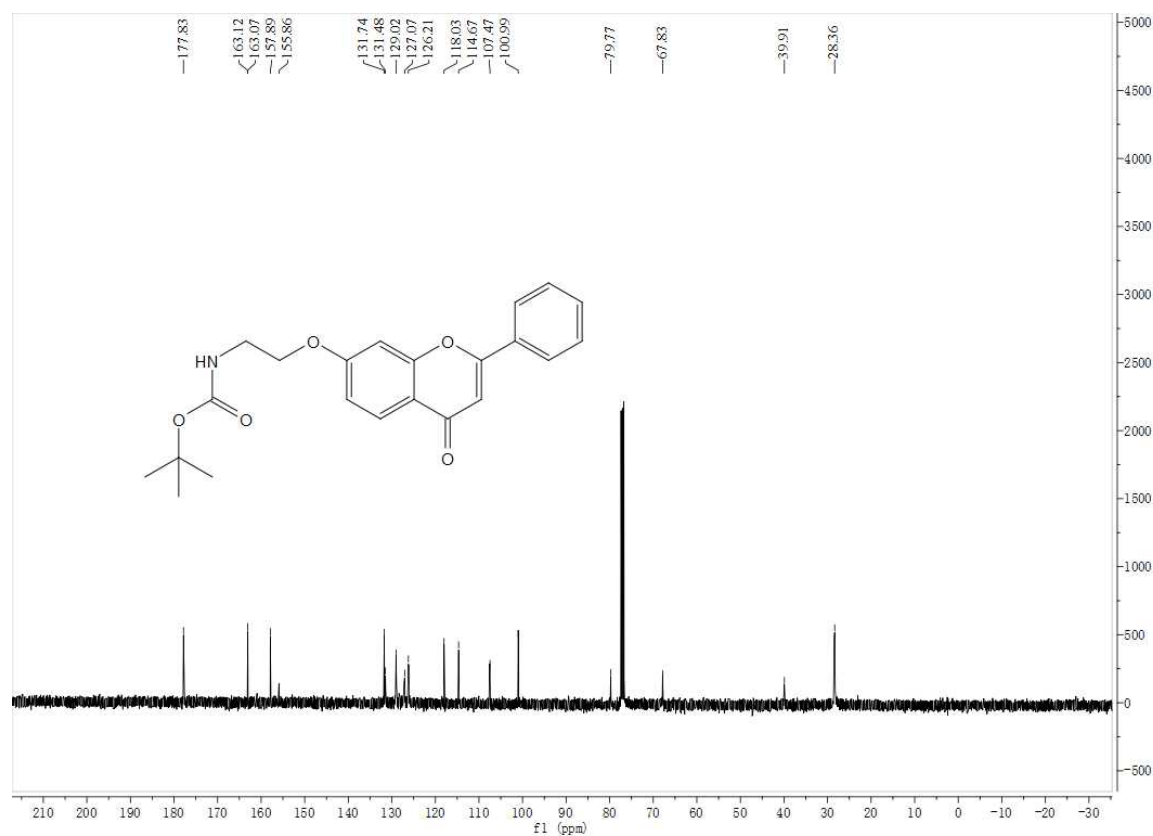NMR spectrum of **2f**Figure S12. <sup>13</sup>C

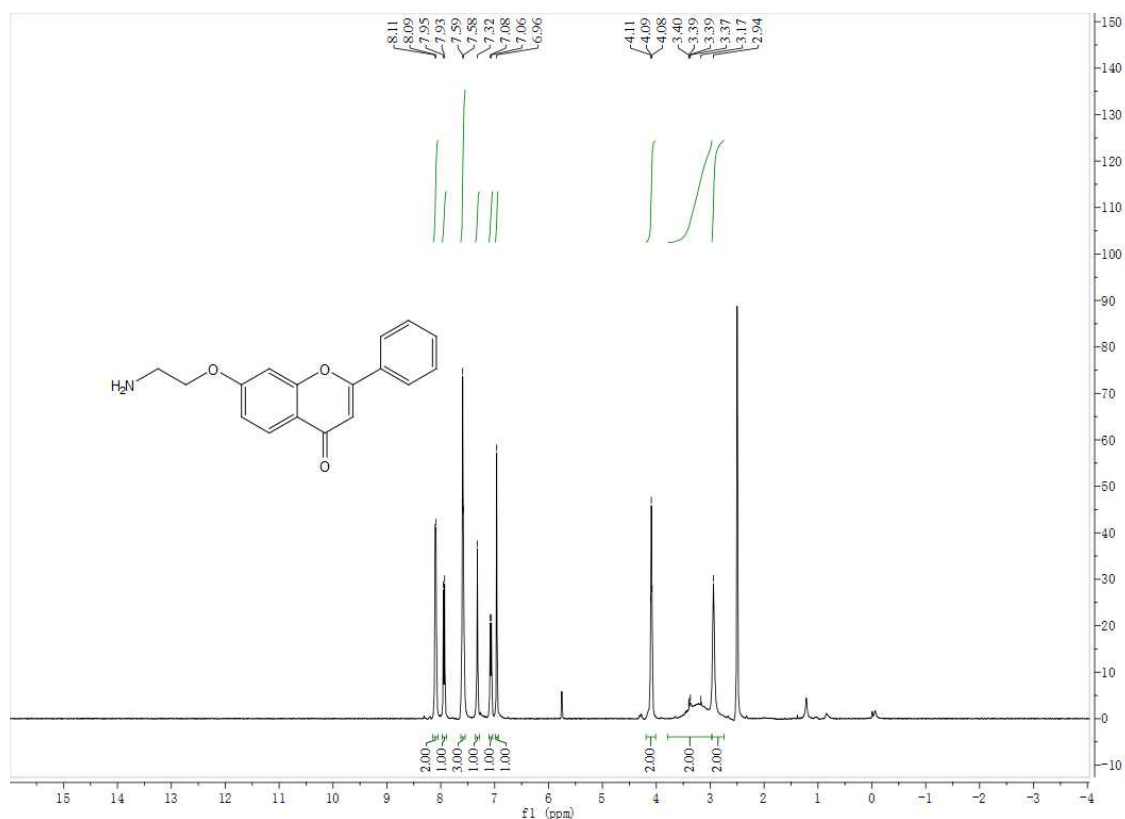Figure S13. <sup>1</sup>H NMR spectrum of 3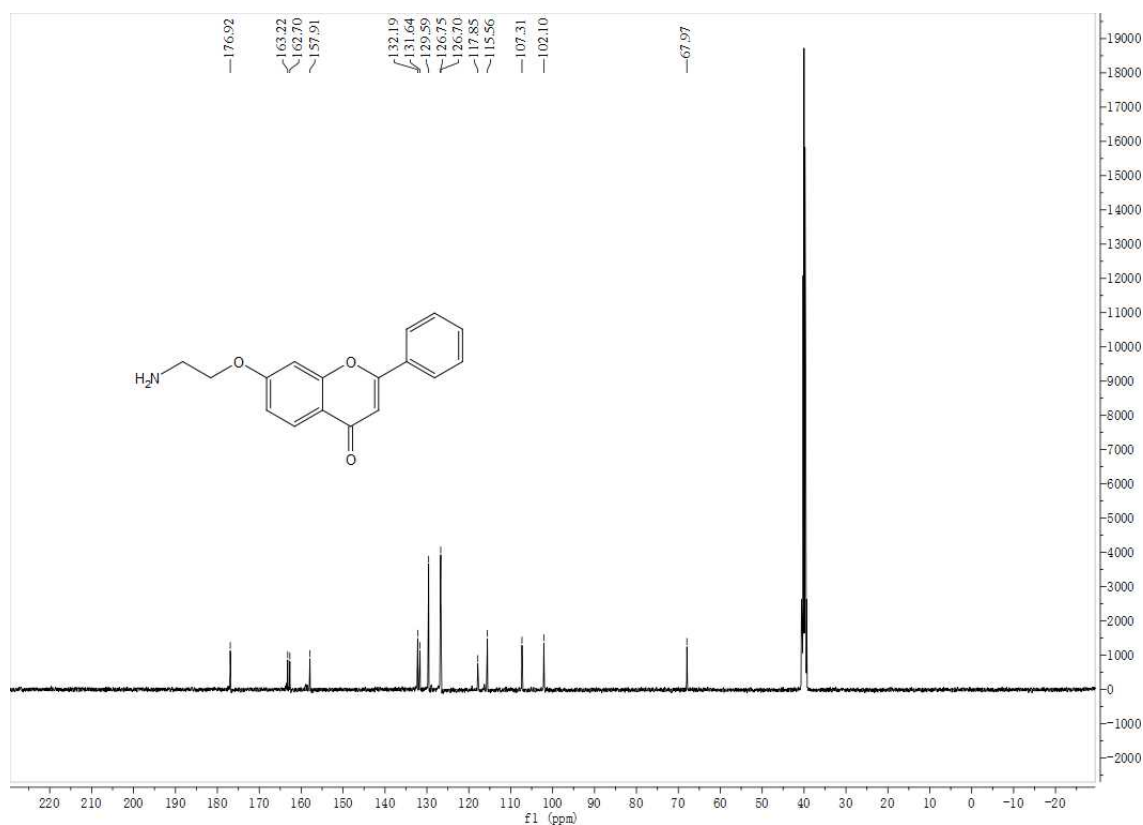Figure S14. <sup>13</sup>C NMR spectrum of 3

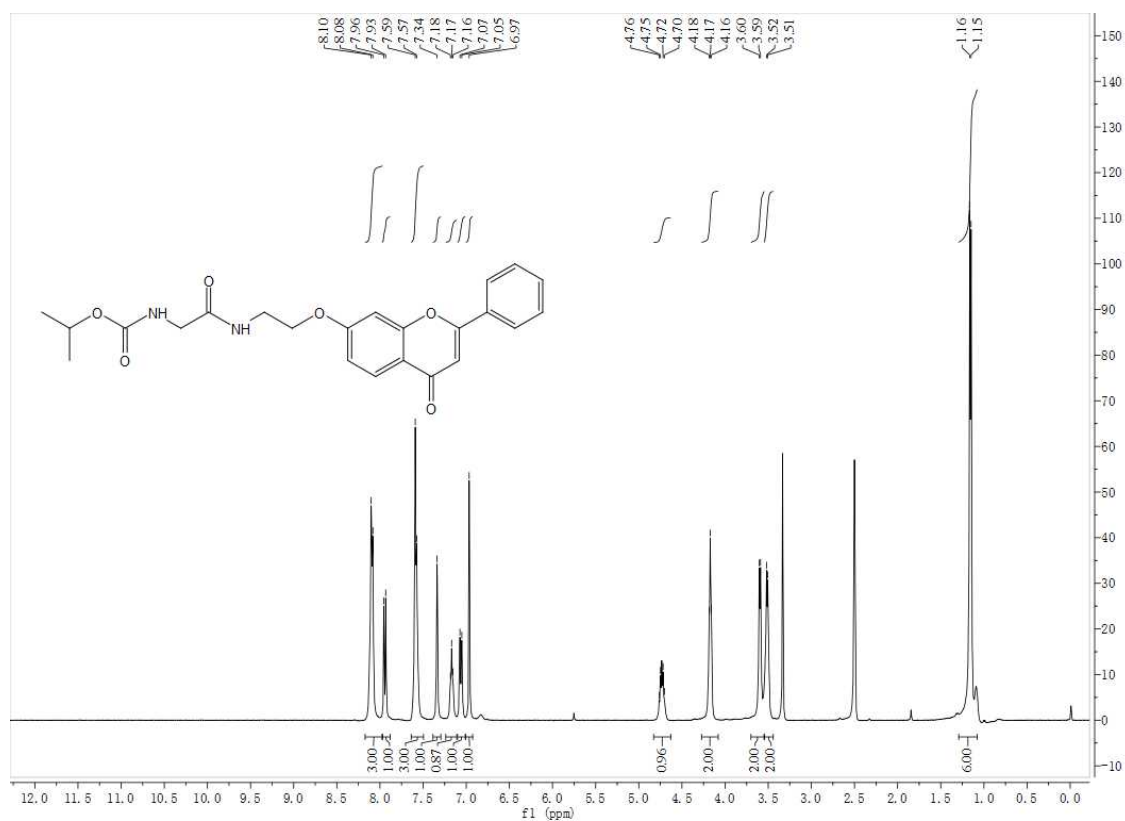Figure S15. <sup>1</sup>H NMR spectrum of 4a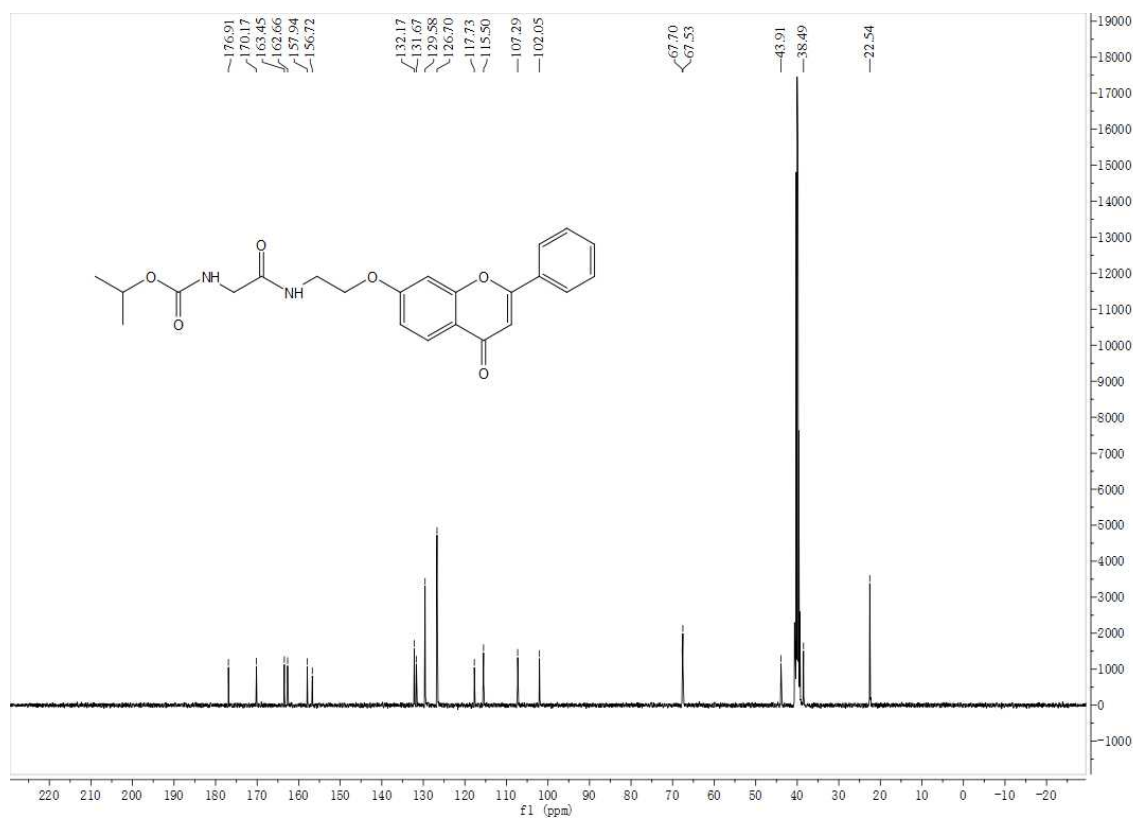Figure S16. <sup>13</sup>C NMR spectrum of 4a

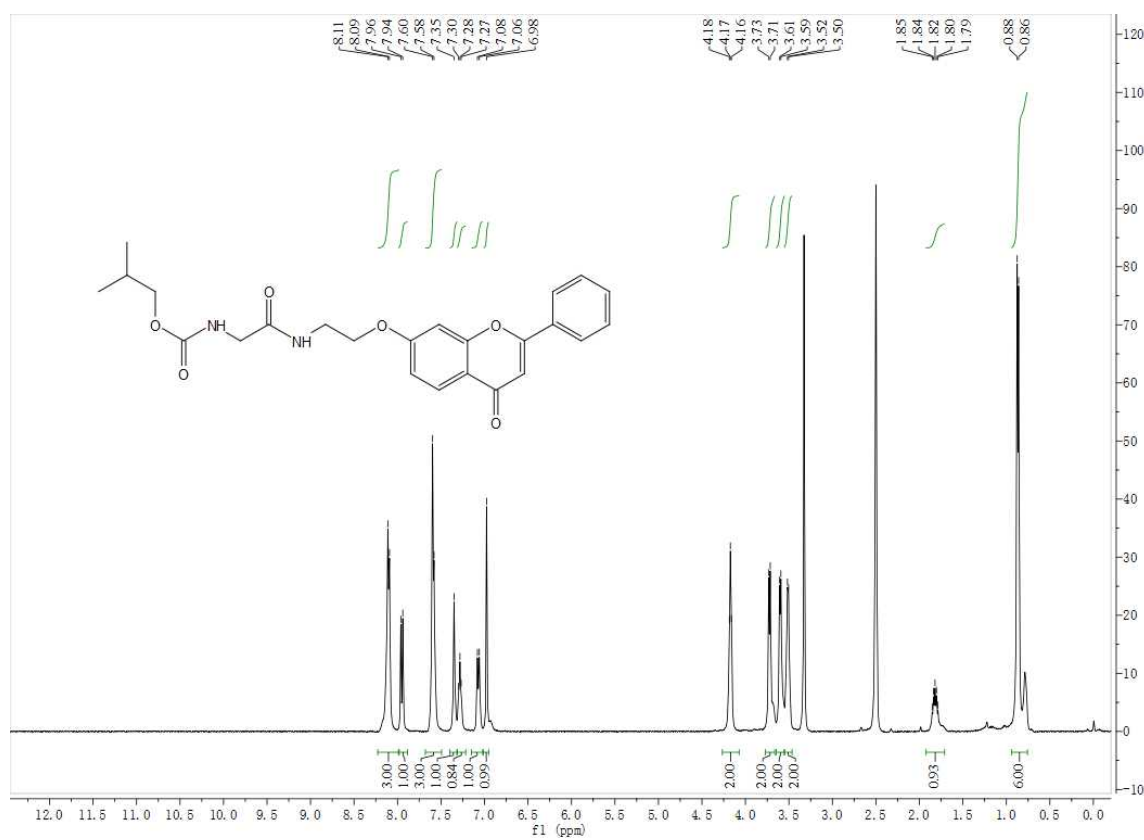

Figure S17.  $^1\text{H}$  NMR spectrum of **4b**



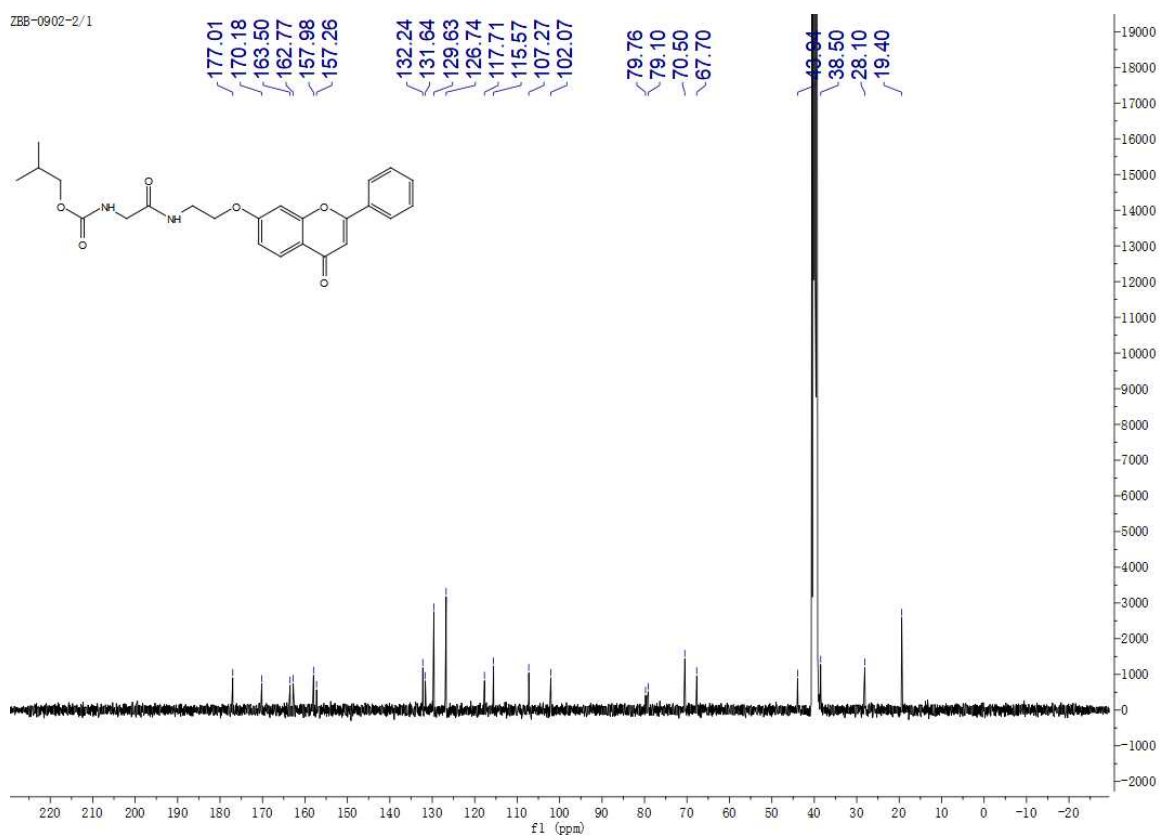Figure S18. <sup>13</sup>C NMR spectrum of 4b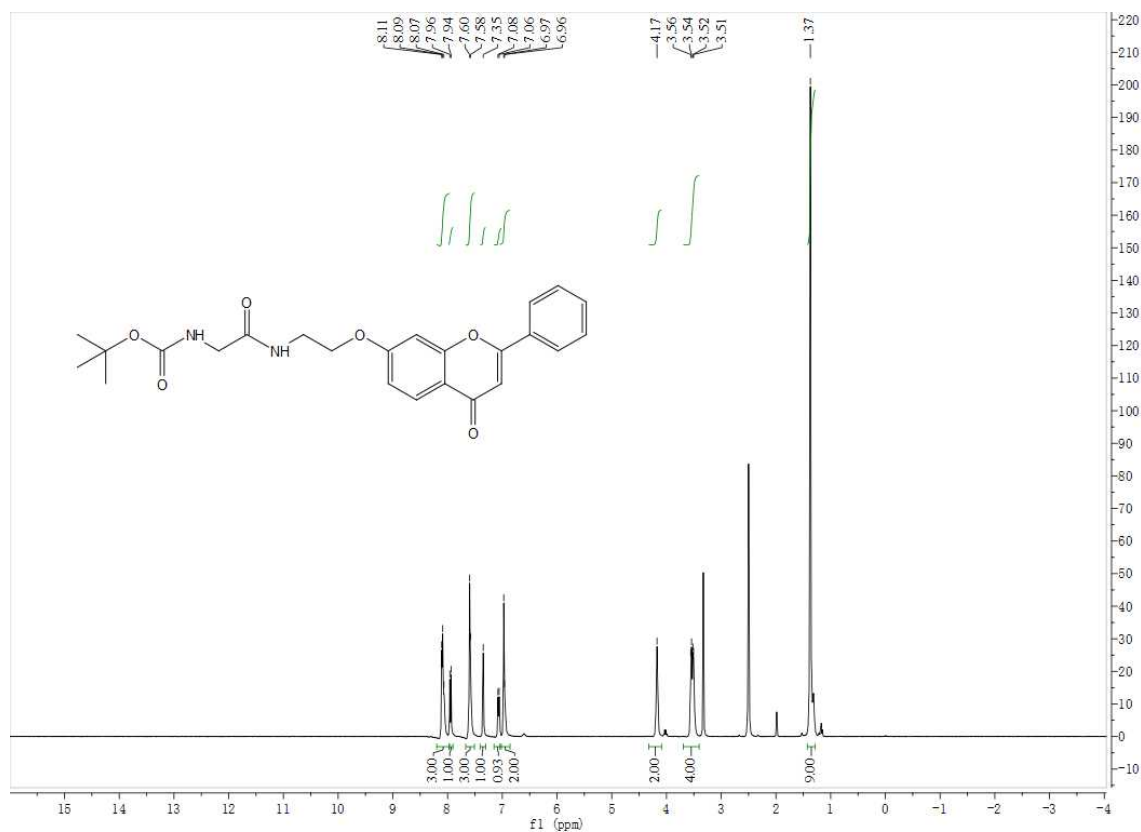Figure S19. <sup>1</sup>H NMR spectrum of 4c

Chemical structure of compound 10: CC(C)OC(=O)N[C@@H](C(=O)NCCOC1=CC=C2C(=C1)O[C@H](C2=O)C3=CC=CC=C3)C

<sup>1</sup>H NMR spectrum (CDCl<sub>3</sub>) of compound 10. The x-axis represents the chemical shift in ppm (f1), ranging from -0.5 to 12.0. The y-axis represents the intensity. The spectrum shows several peaks with corresponding integrations and chemical shifts labeled at the top.

Chemical shifts (ppm) labeled at the top: 8.09, 8.08, 7.95, 7.93, 7.59, 7.57, 7.32, 7.14, 7.13, 7.06, 7.04, 6.96, 4.72, 4.71, 4.69, 4.16, 4.03, 4.02, 4.00, 3.51, 3.50, 3.49, 1.19, 1.17, 1.14, 1.13.

Integrations labeled below the spectrum: 3.00, 1.00, 3.00, 1.00, 0.88, 1.00, 1.00, 1.00, 1.00, 1.00, 2.00, 2.00, 2.00, 3.00, 6.00.

Figure S21.  $^1\text{H}$  NMR spectrum of 4d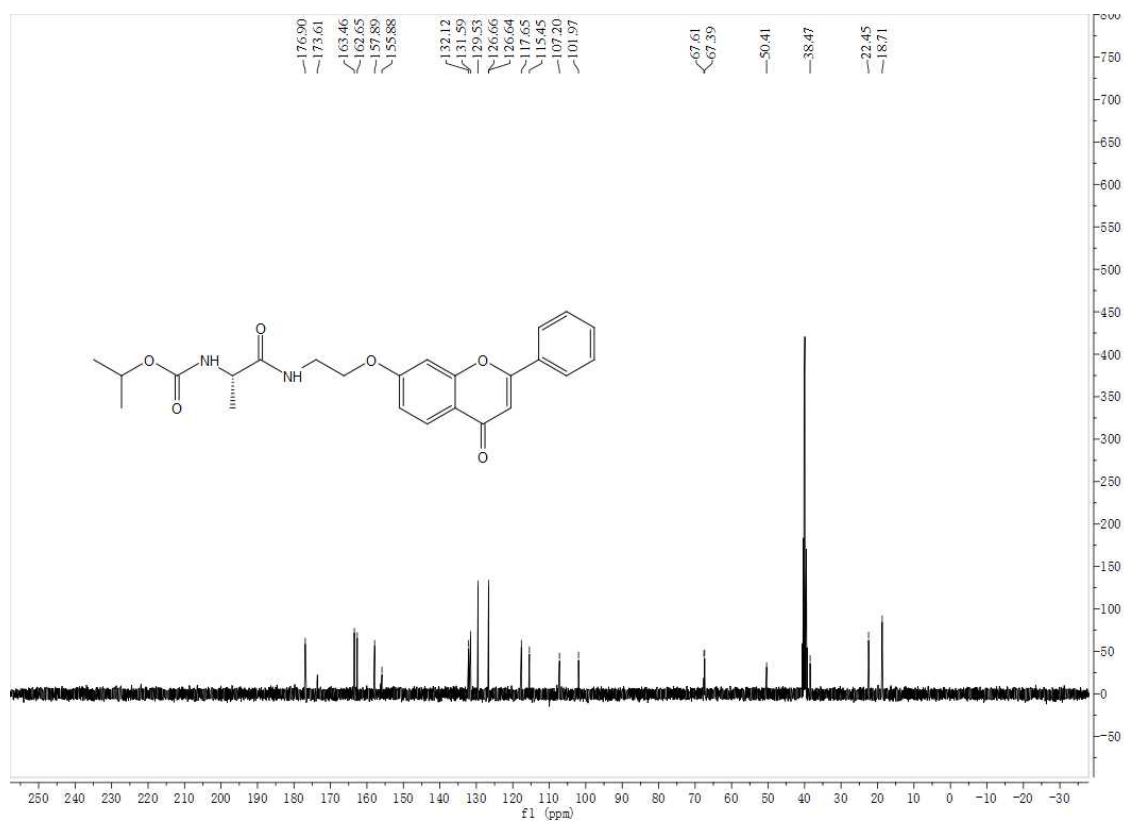Figure S22.  $^{13}\text{C}$  NMR spectrum of 4d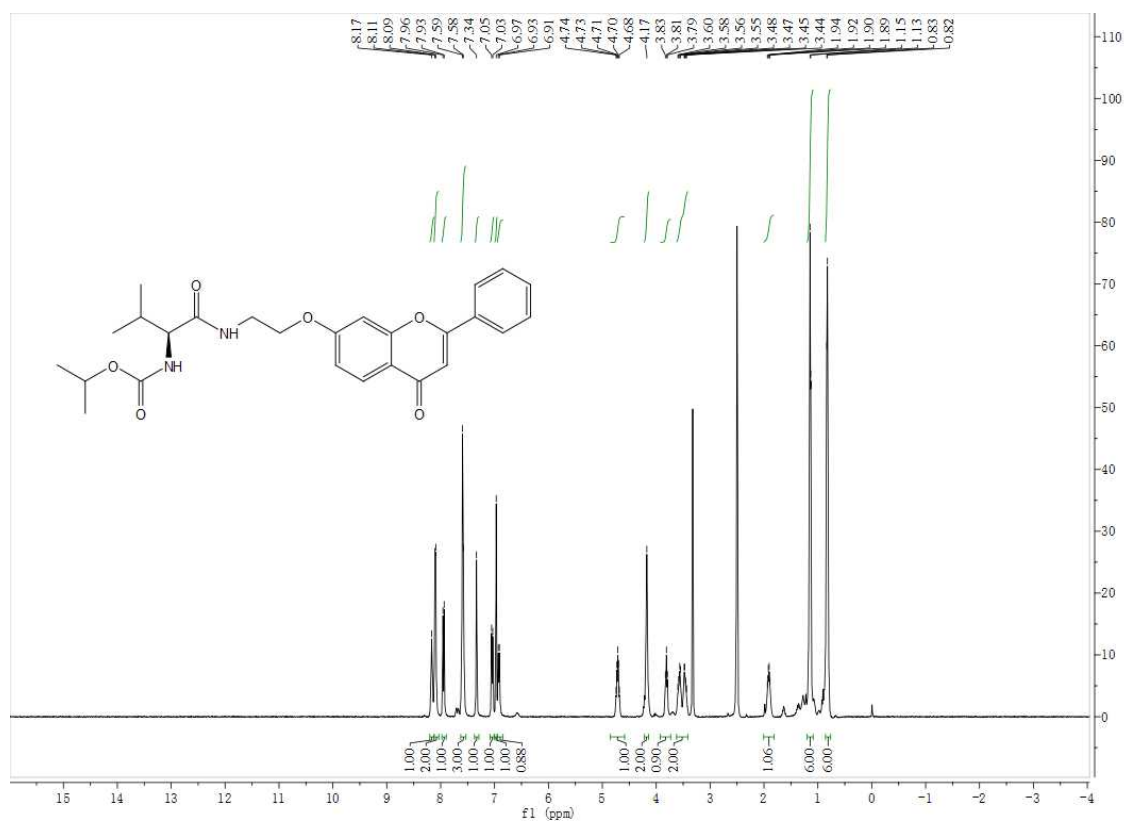

Figure S23.  $^1\text{H}$  NMR spectrum of 4e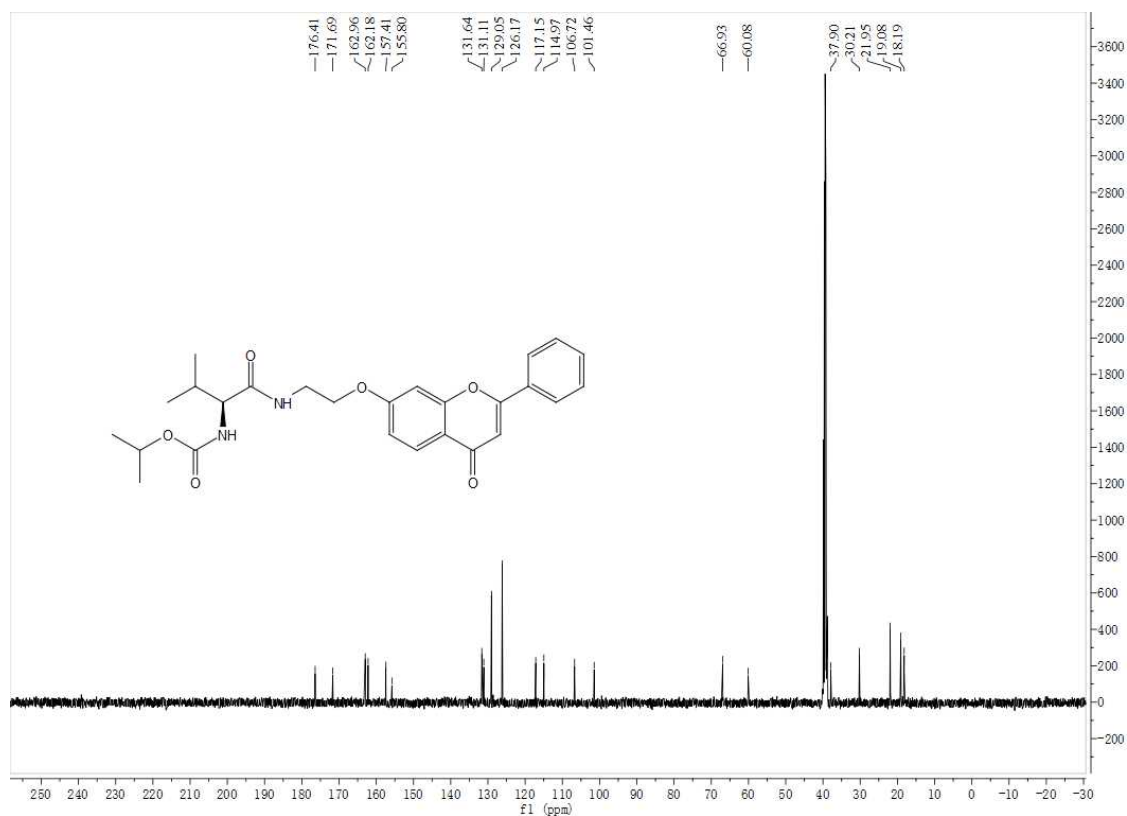Figure S24.  $^{13}\text{C}$  NMR spectrum of 4e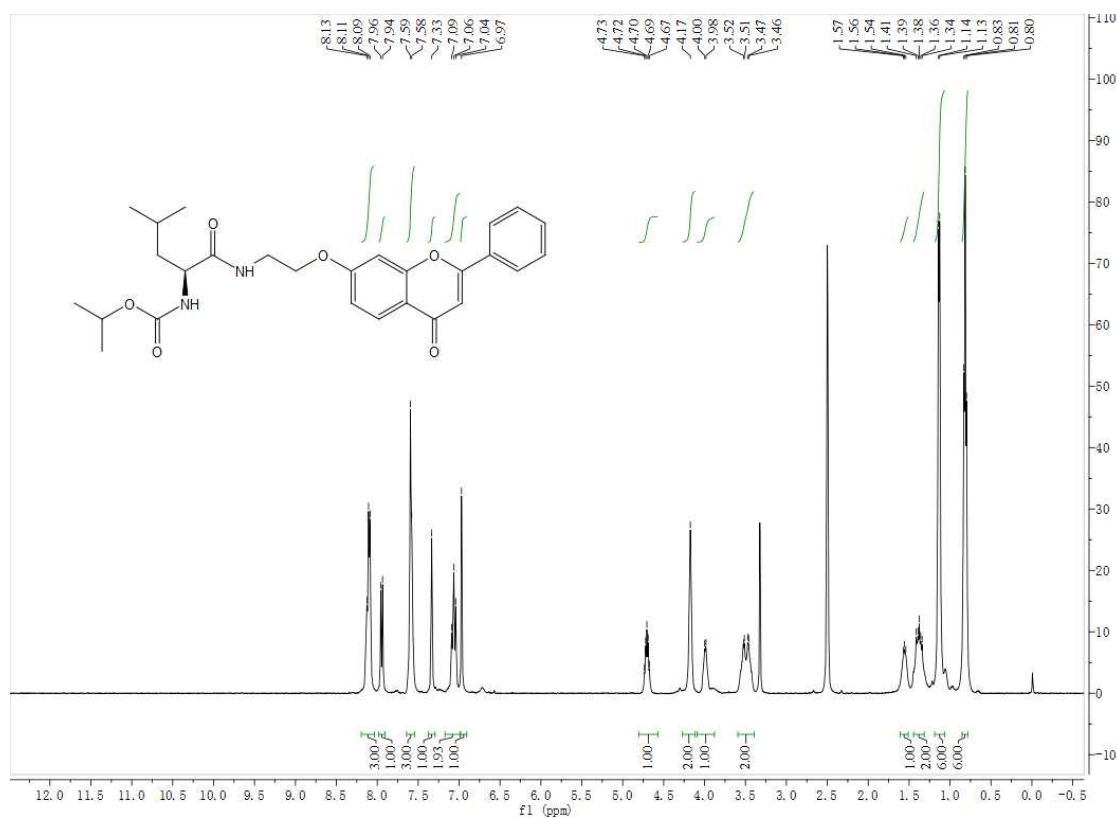

Figure S25.  $^1\text{H}$  NMR spectrum of 4f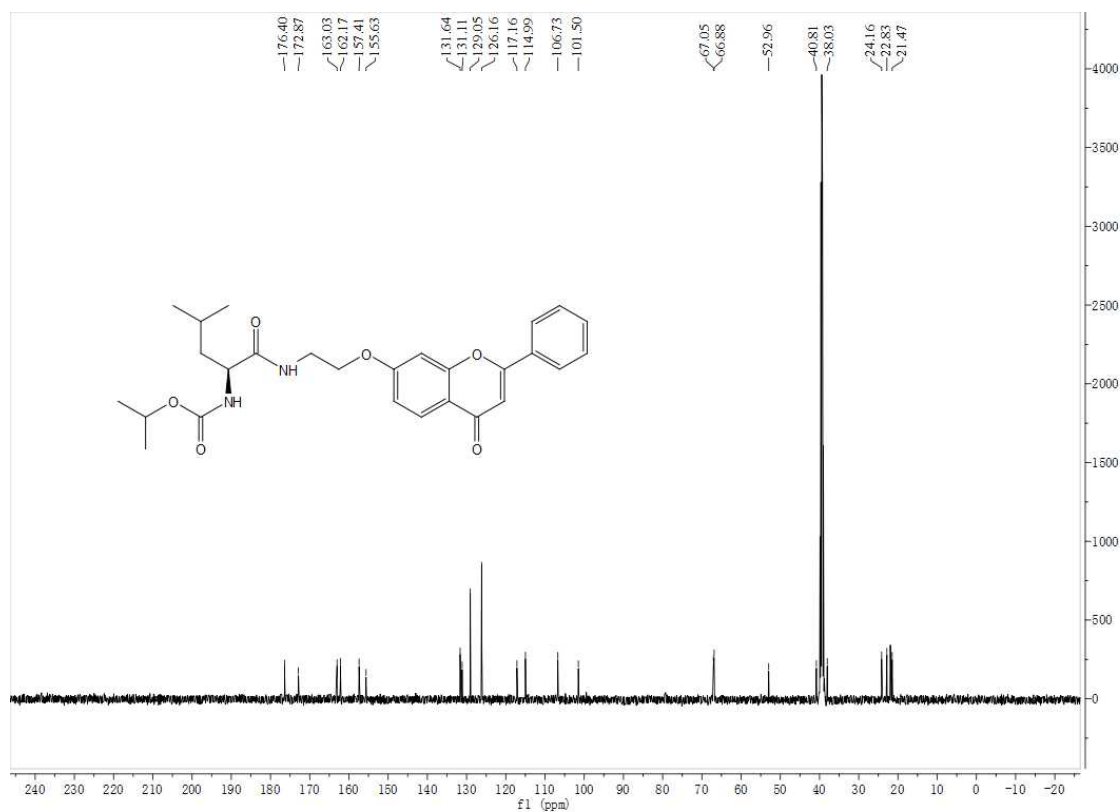Figure S26.  $^{13}\text{C}$  NMR spectrum of 4f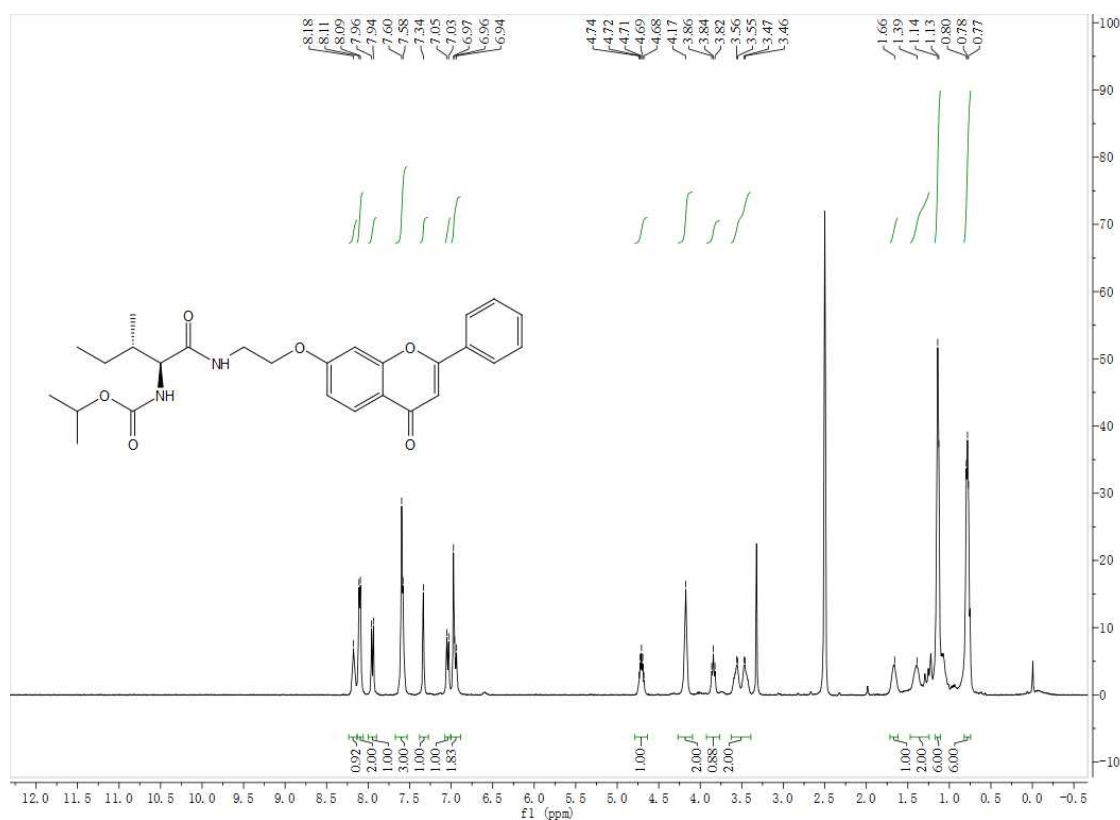

Figure S27.  $^1\text{H}$  NMR spectrum of 4g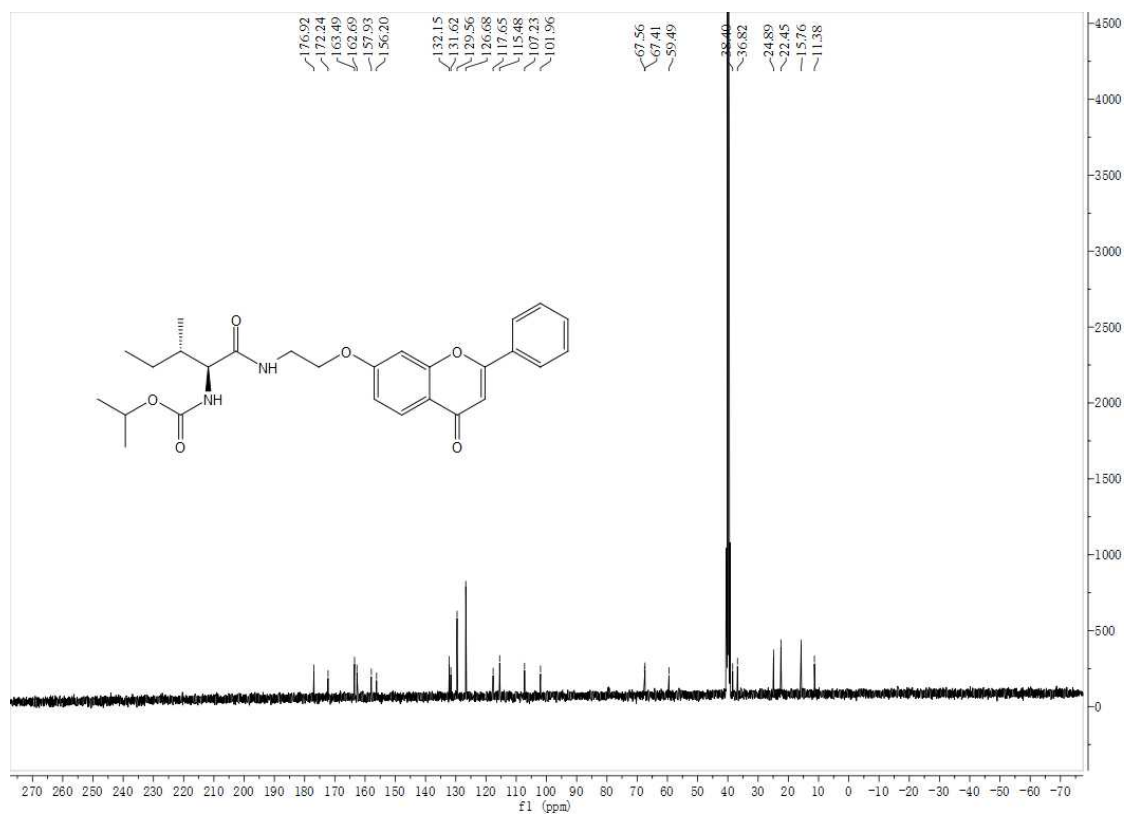Figure S28.  $^{13}\text{C}$  NMR spectrum of 4g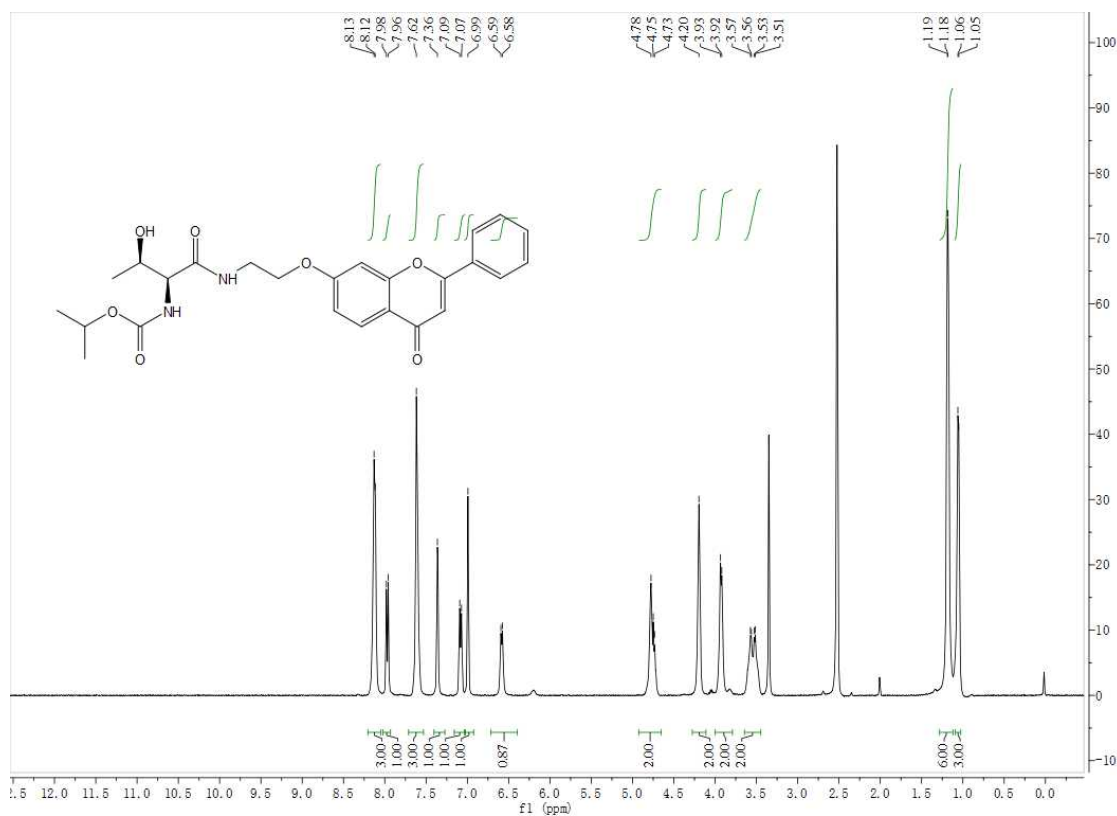

Figure S29.  $^1\text{H}$  NMR spectrum of 4h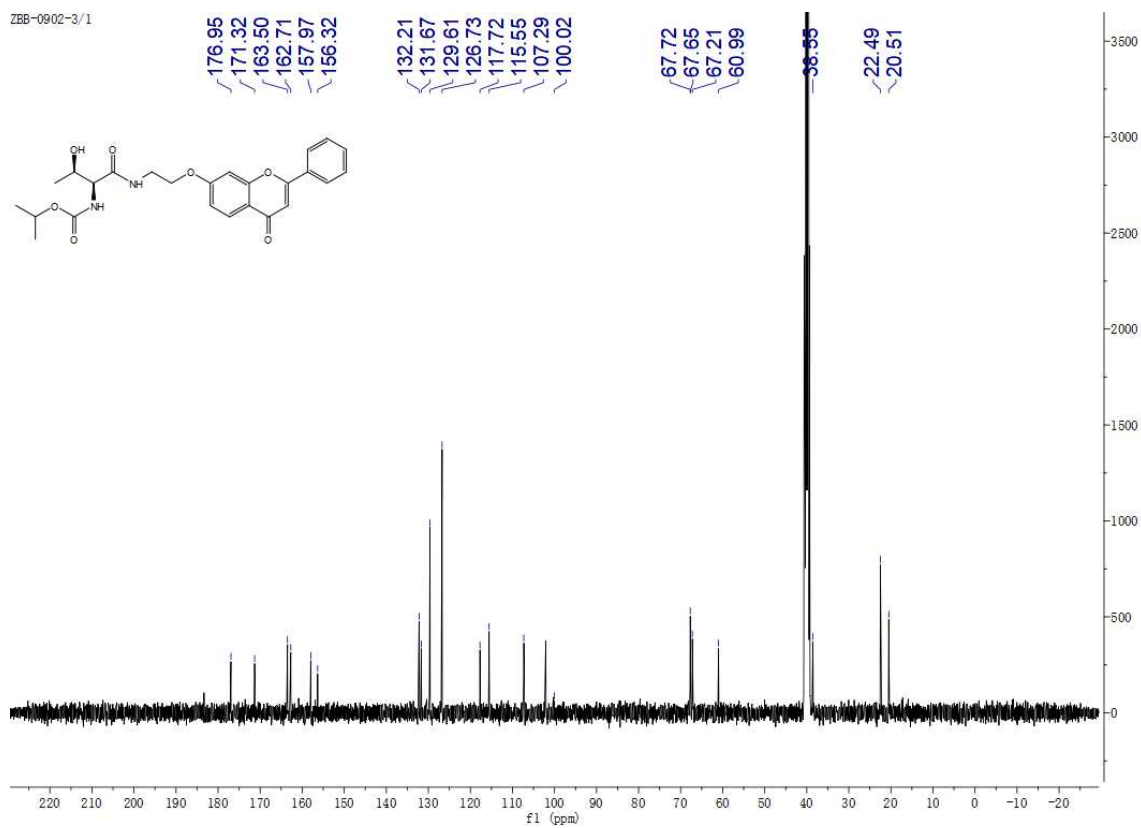Figure S30.  $^{13}\text{C}$  NMR spectrum of 4h

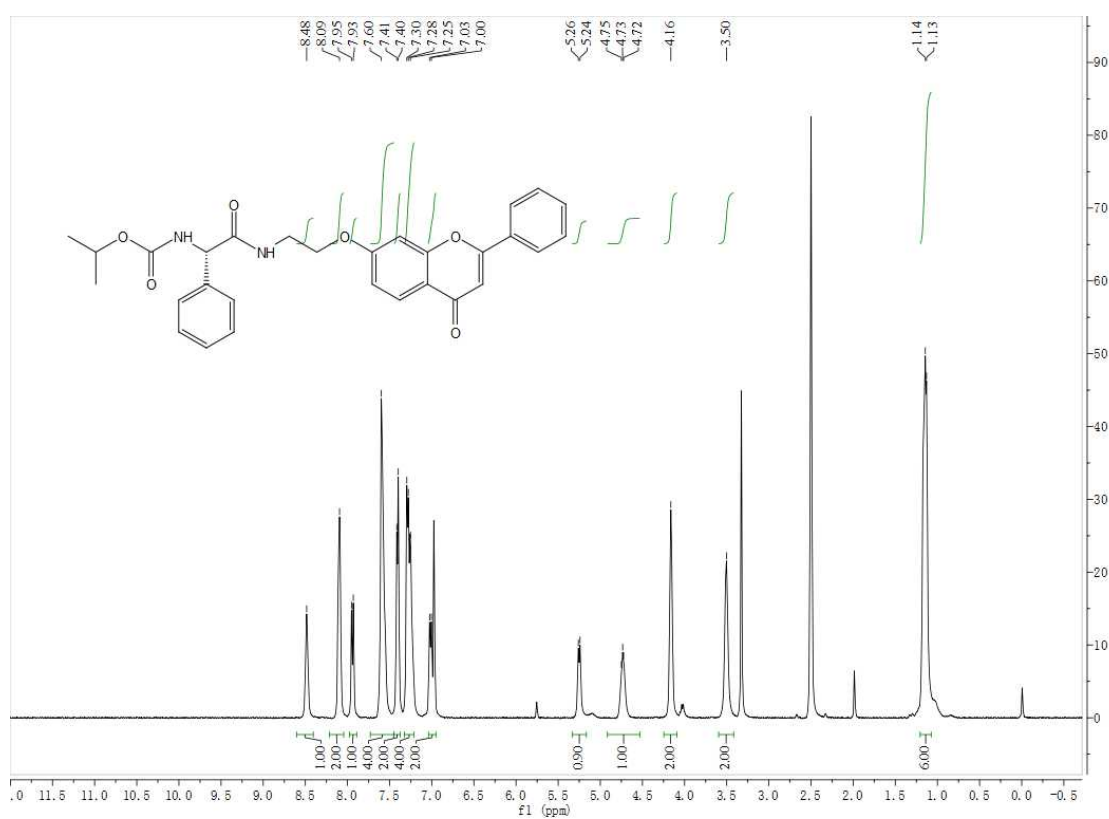Figure S31. <sup>1</sup>H NMR spectrum of **4i**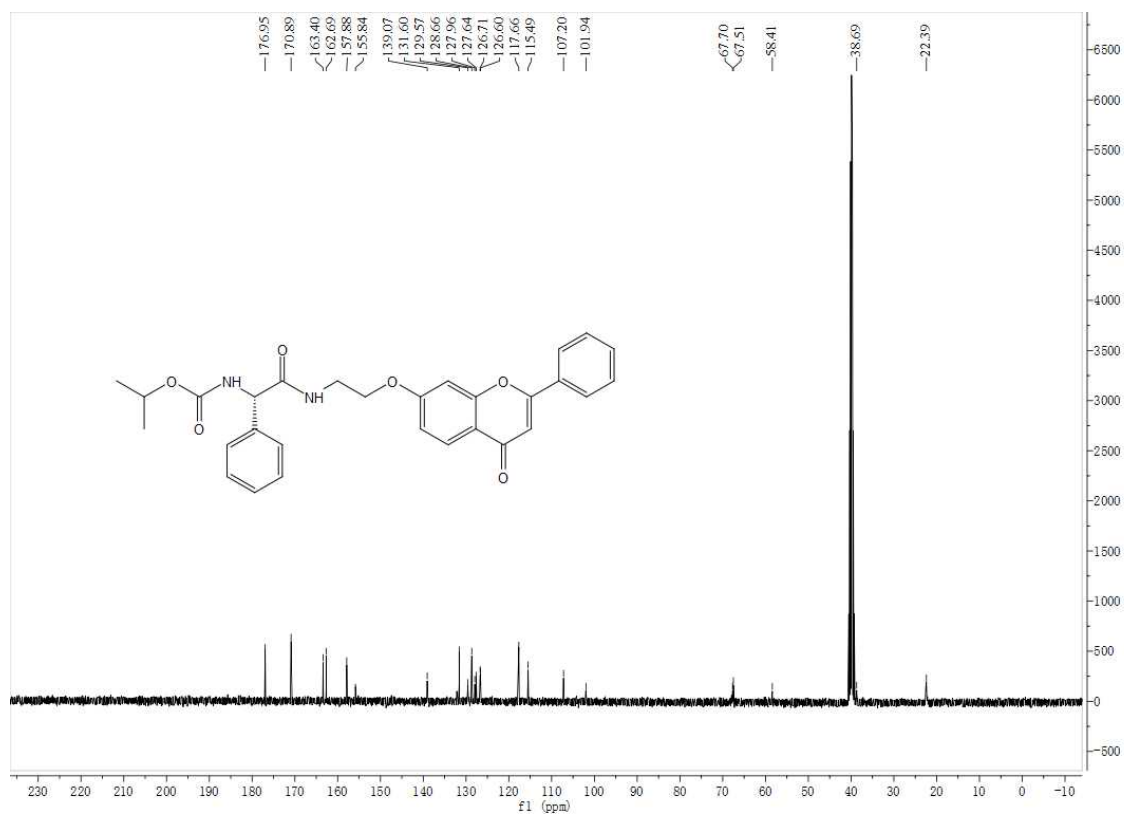Figure S32. <sup>13</sup>C NMR spectrum of **4i**



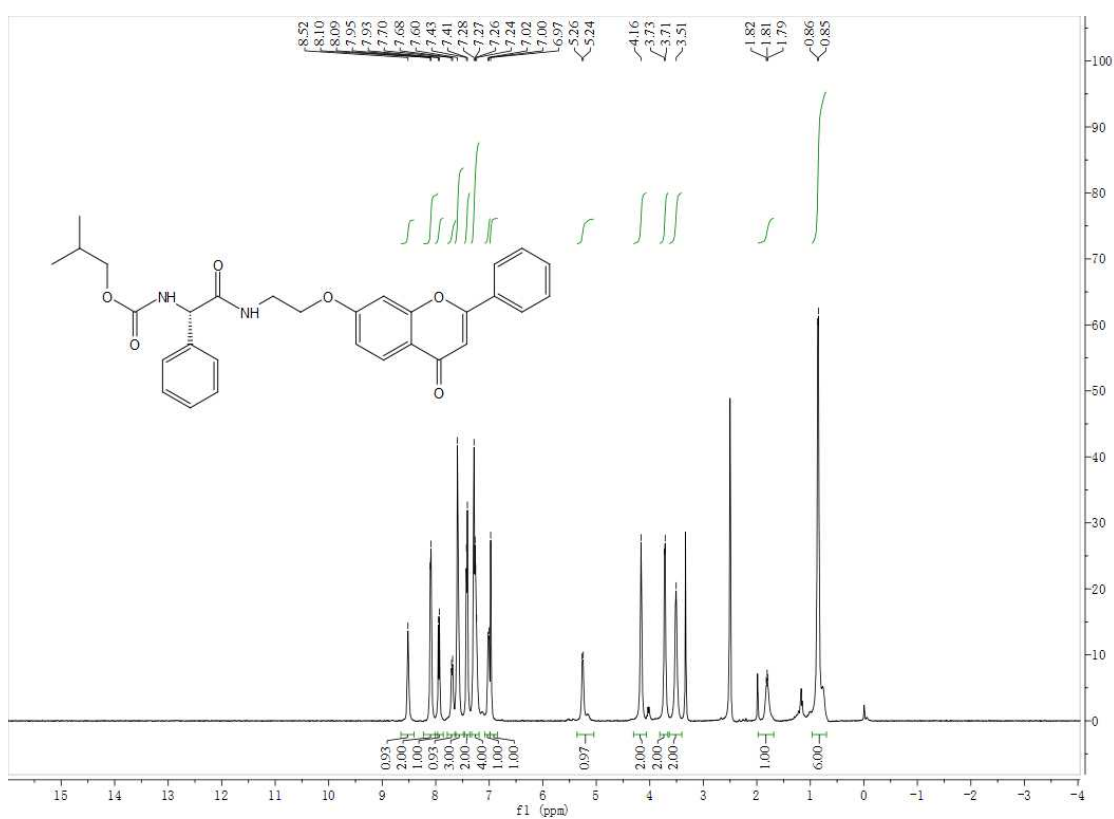Figure S33. <sup>1</sup>H NMR spectrum of 4j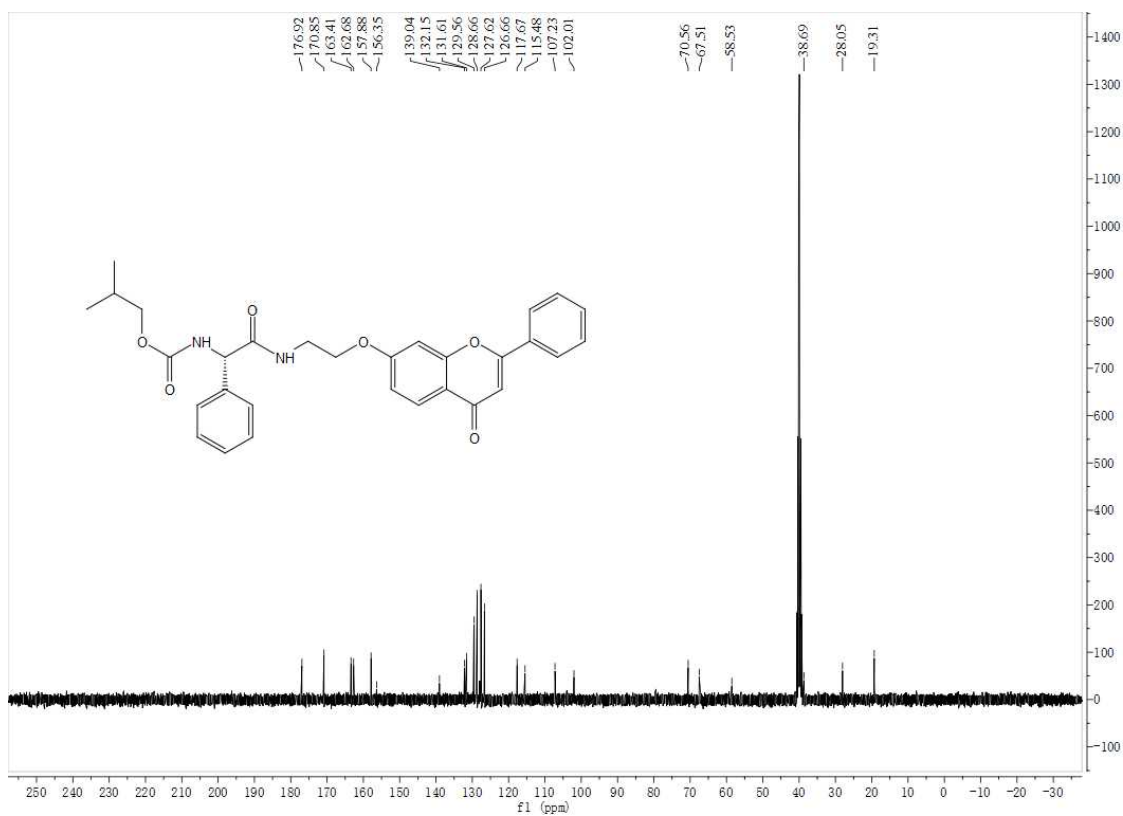Figure S34. <sup>13</sup>C NMR spectrum of 4j

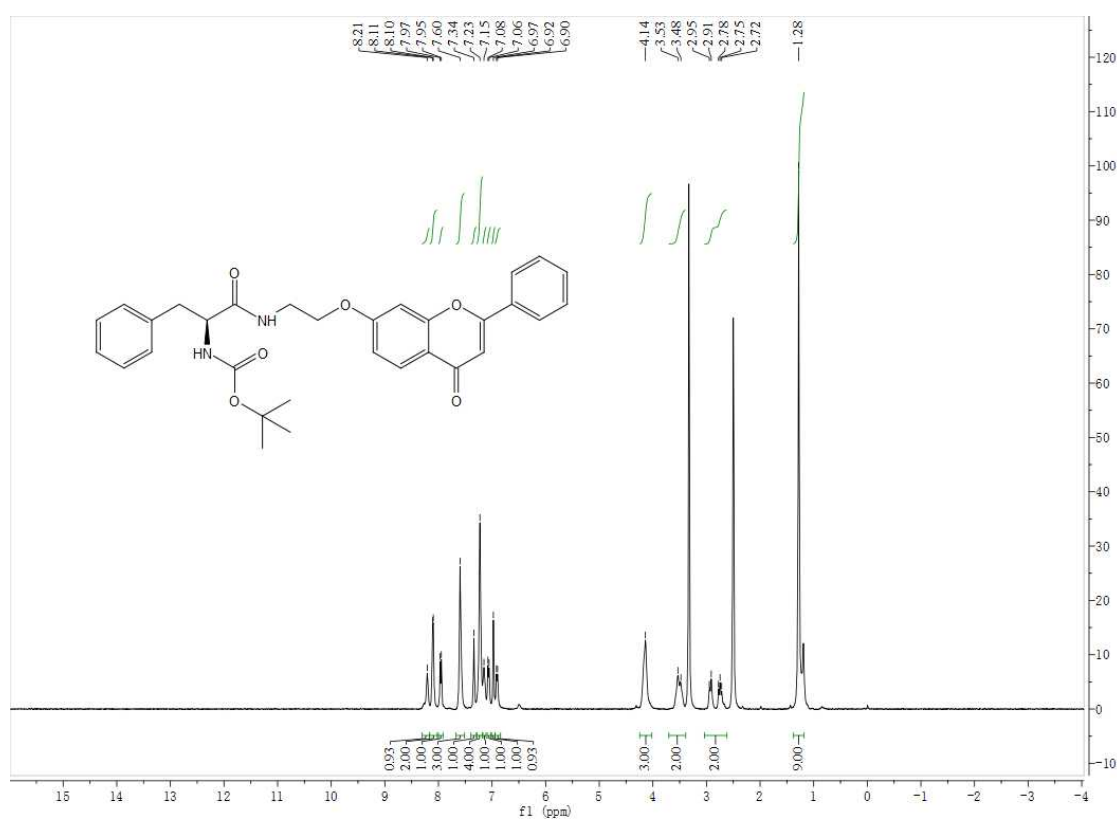Figure S35. <sup>1</sup>H NMR spectrum of 4k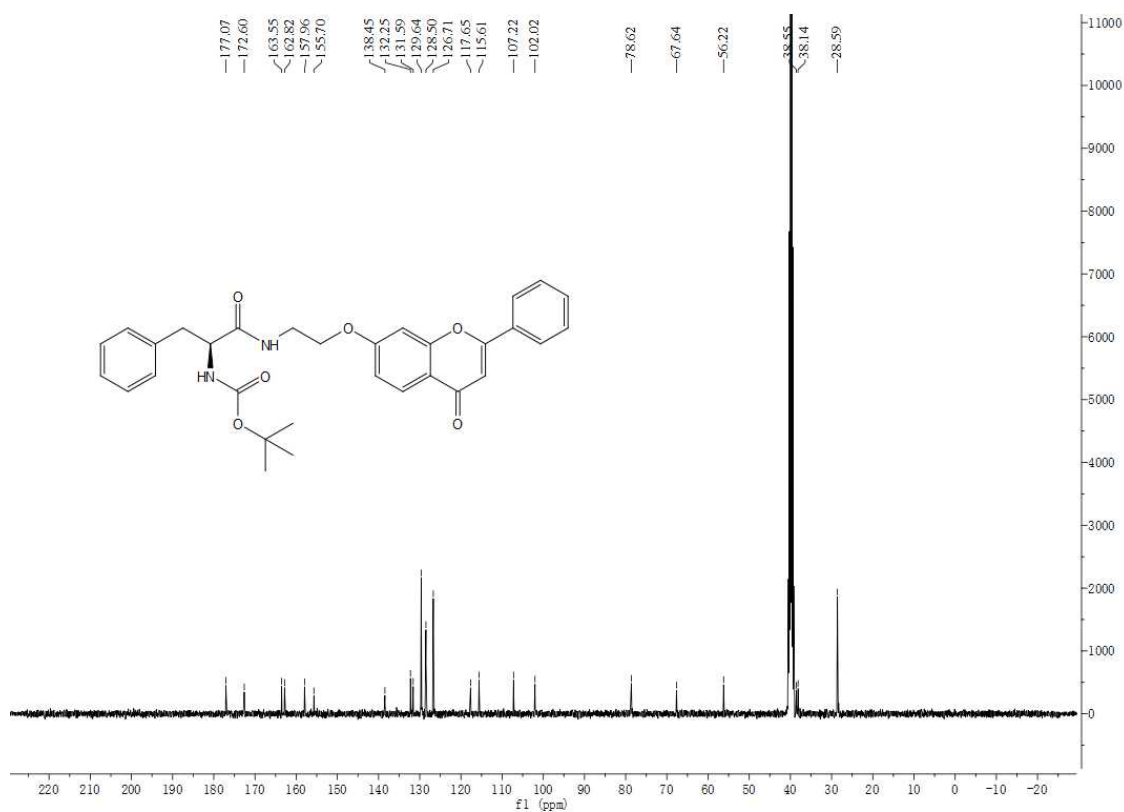Figure S36. <sup>13</sup>C NMR spectrum of 4k

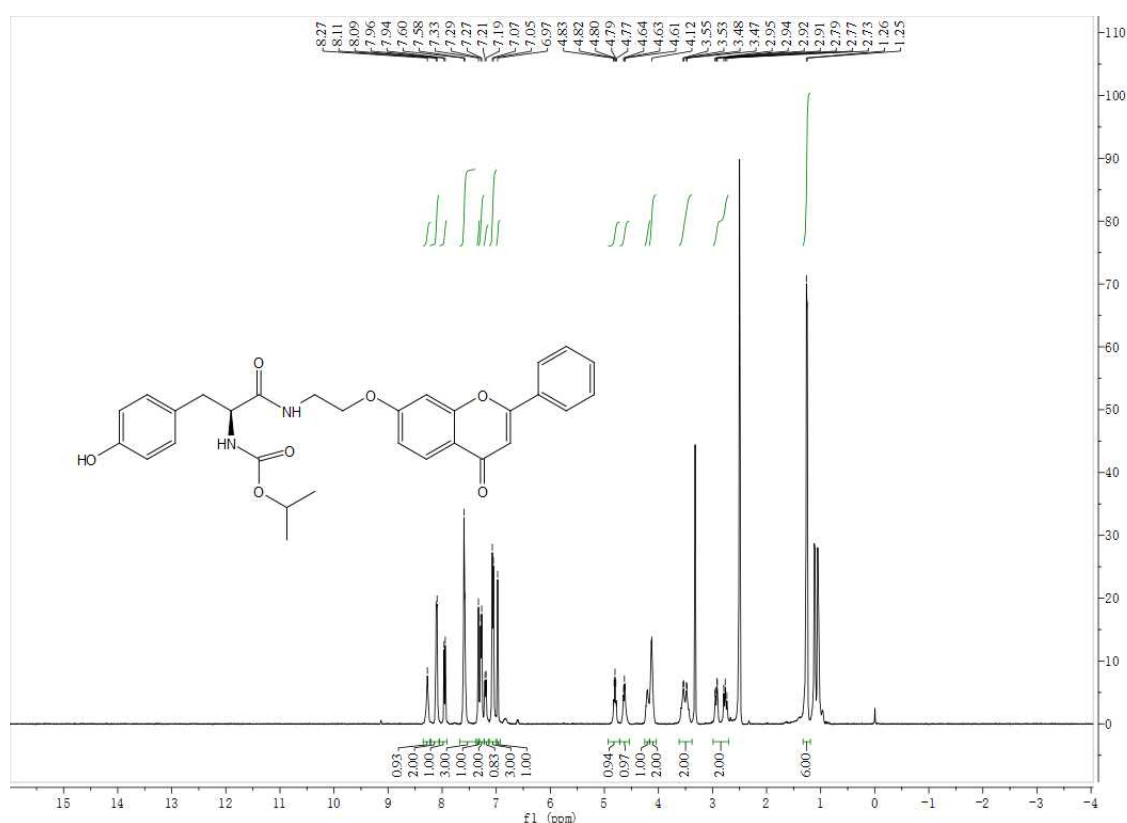Figure S37. <sup>1</sup>H NMR spectrum of 41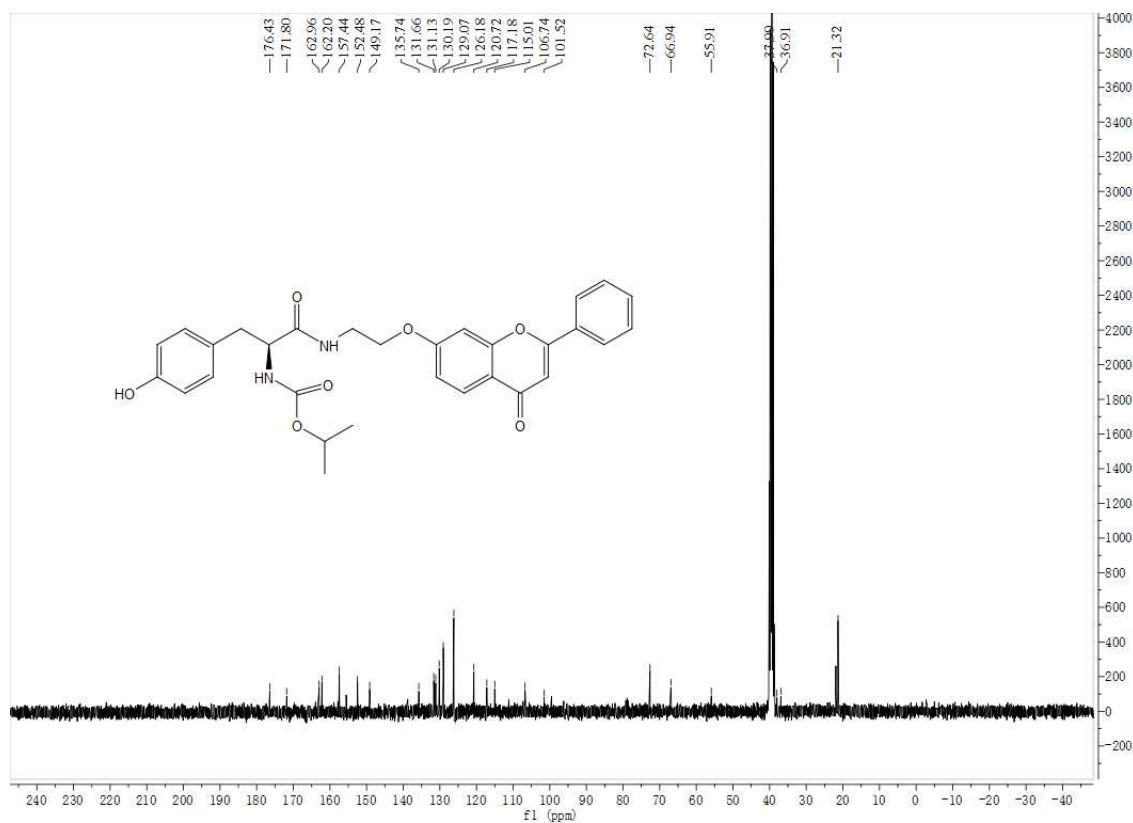Figure S38. <sup>13</sup>C NMR spectrum of 41

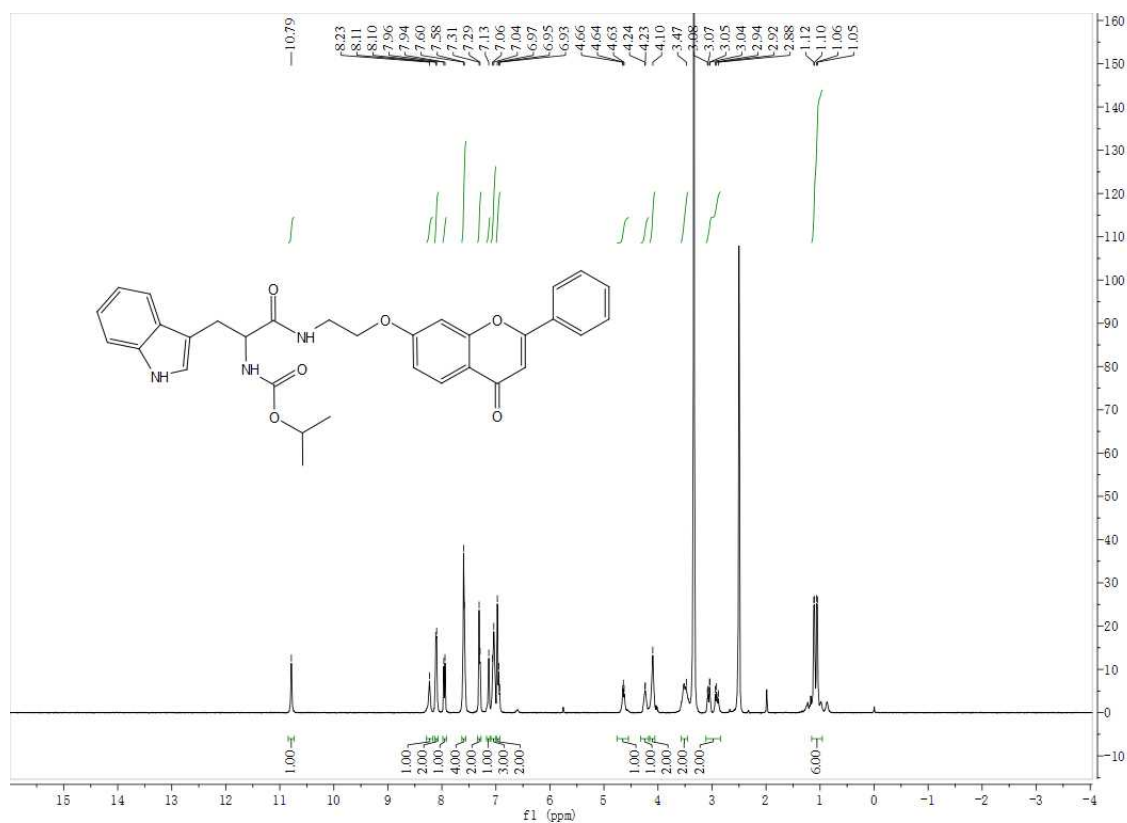Figure S39. <sup>1</sup>H NMR spectrum of **4m**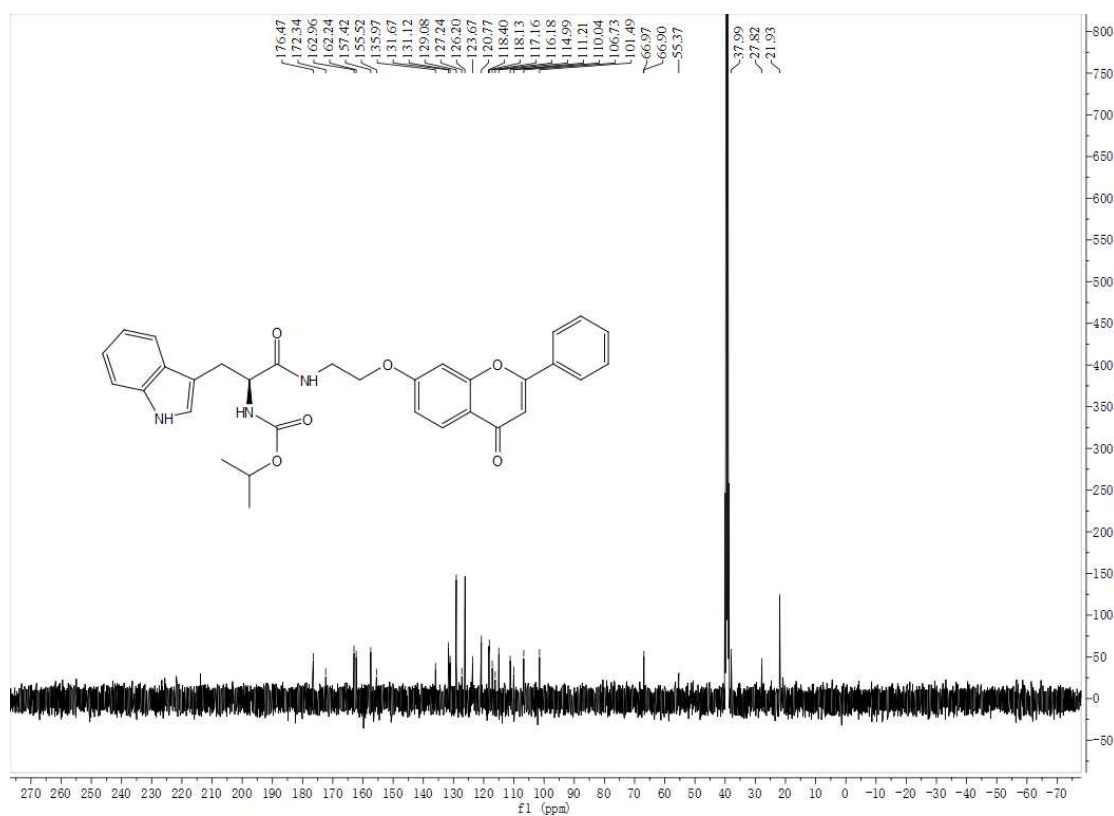Figure S40. <sup>13</sup>C NMR spectrum of **4m**

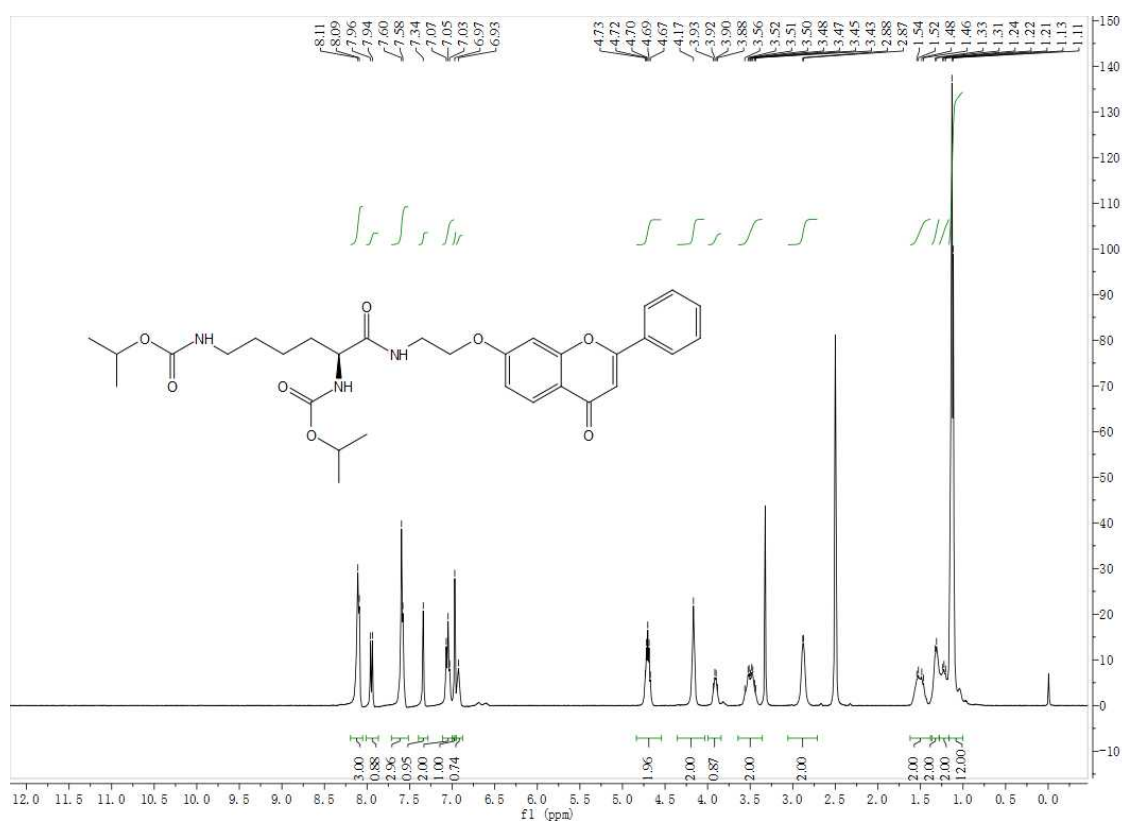Figure S41. <sup>1</sup>H NMR spectrum of 4n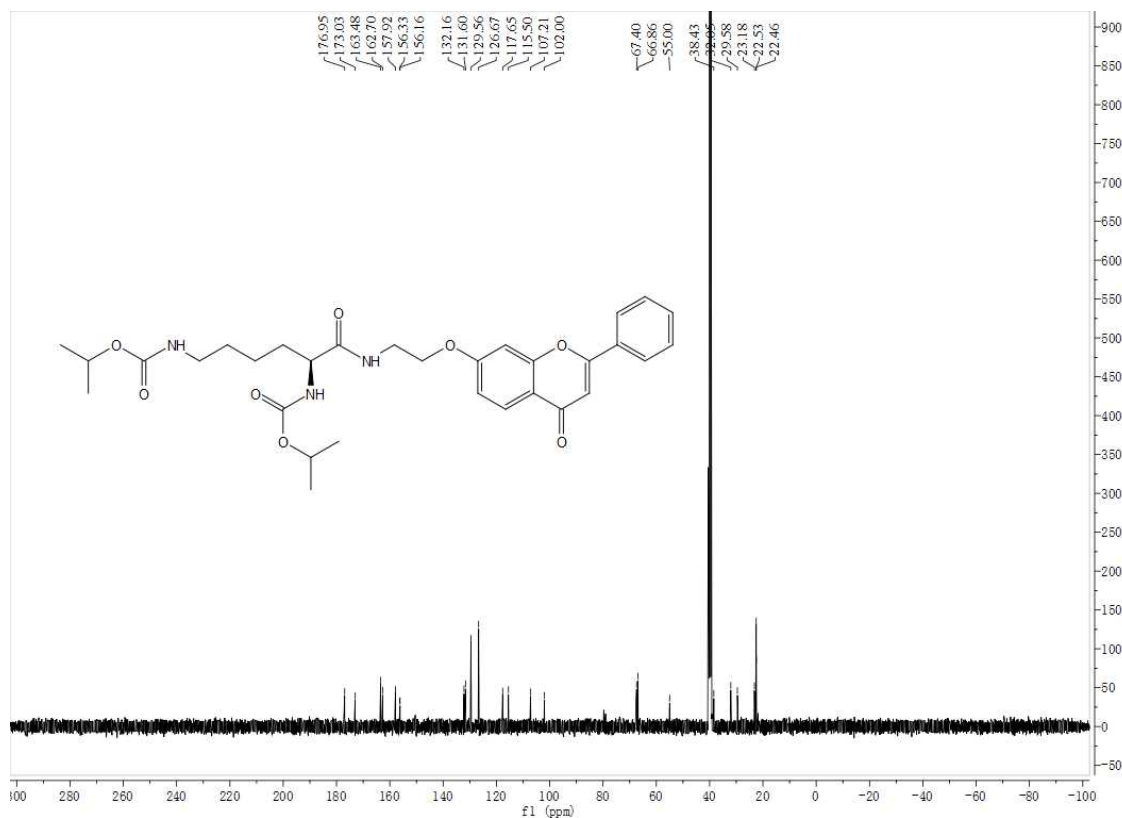Figure S42. <sup>13</sup>C NMR spectrum of 4n

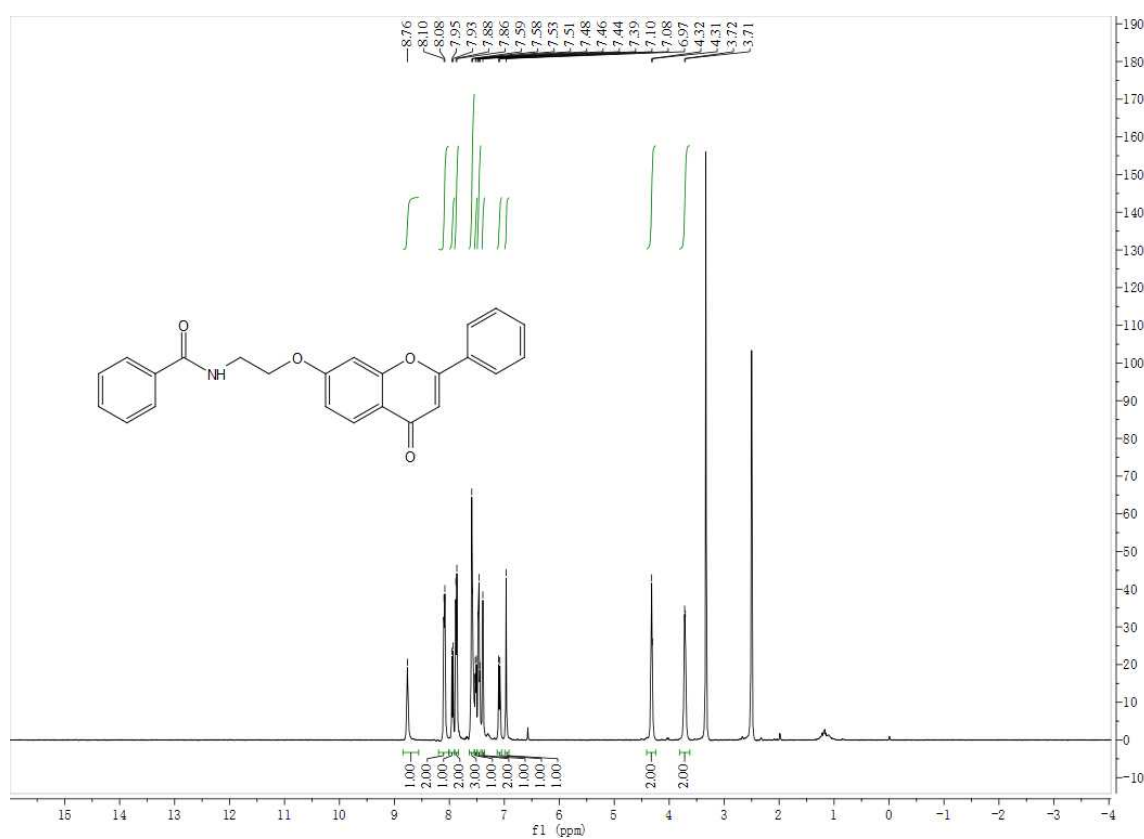Figure S43. <sup>1</sup>H NMR spectrum of 5a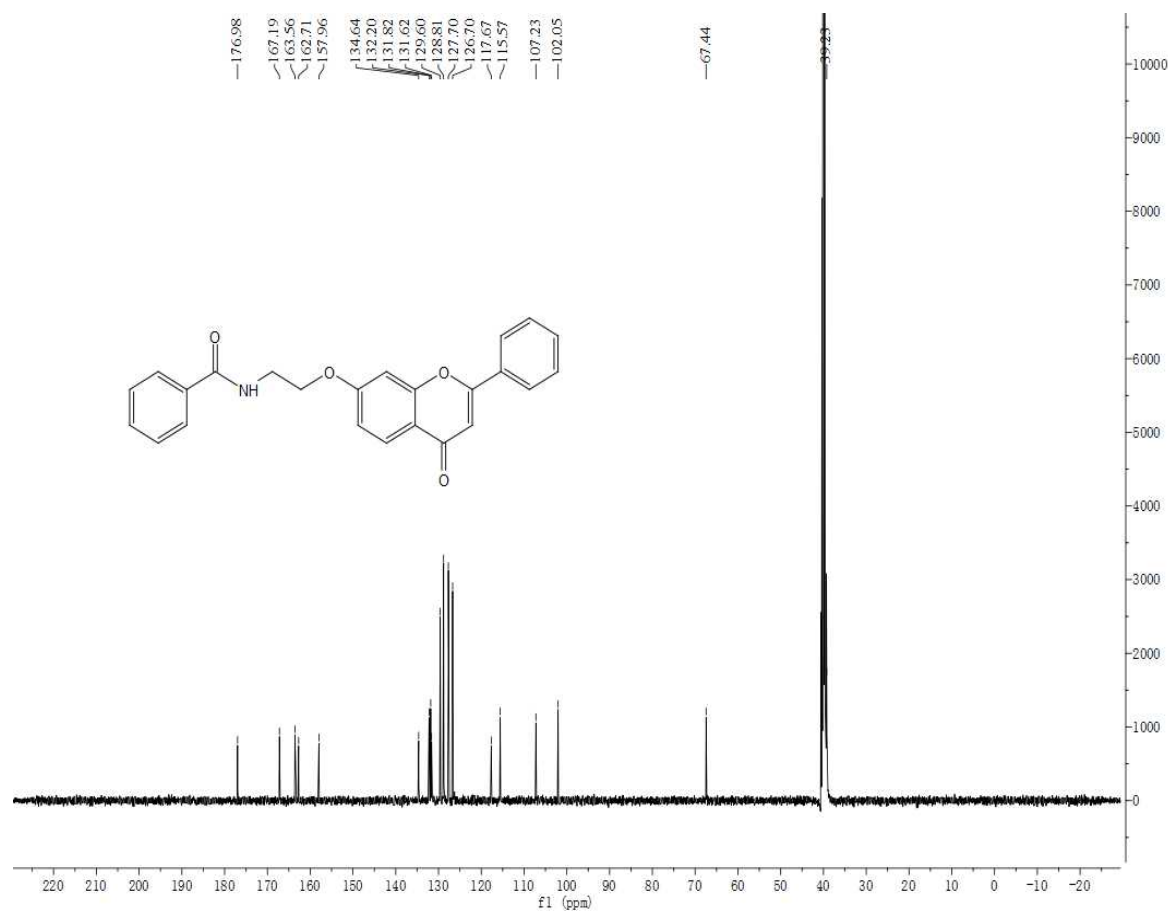

**Figure S44.**  $^{13}\text{C}$  NMR spectrum of **5a**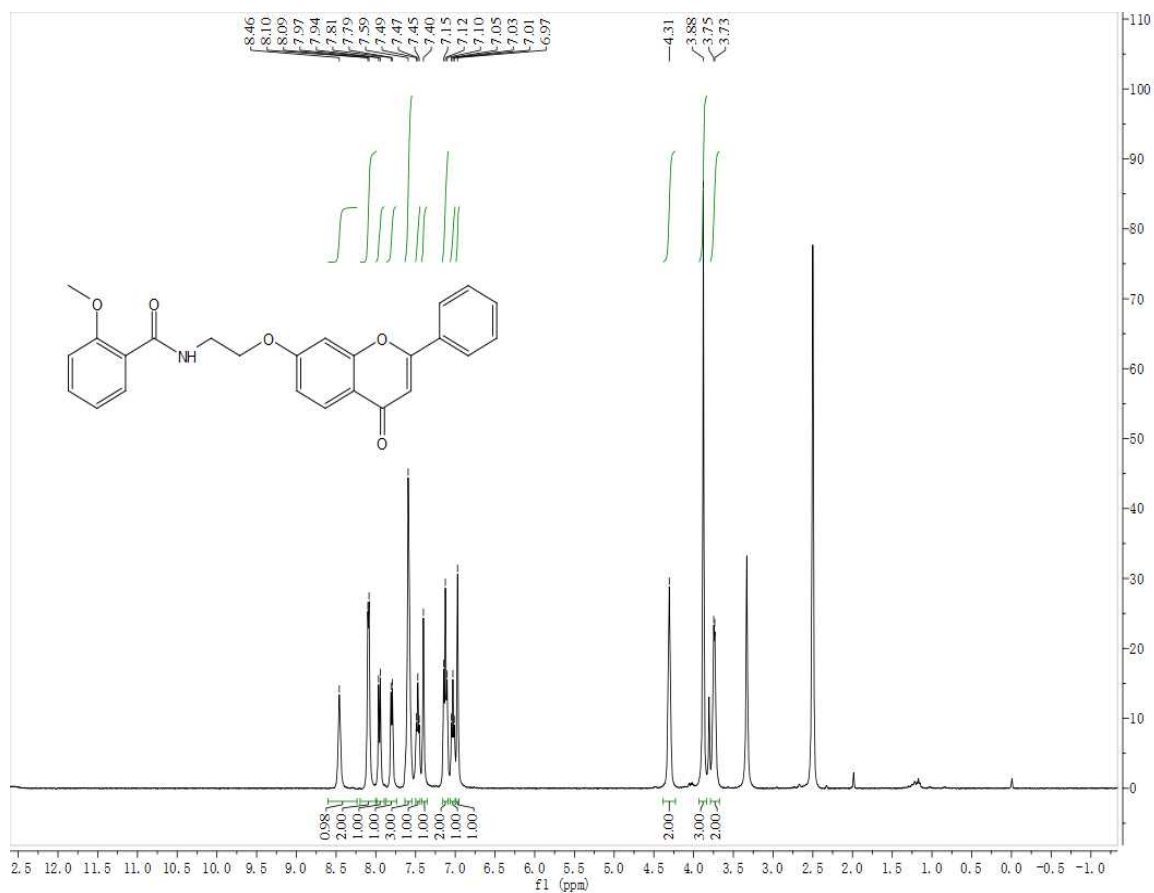**Figure S45.**  $^1\text{H}$  NMR spectrum of **5b**

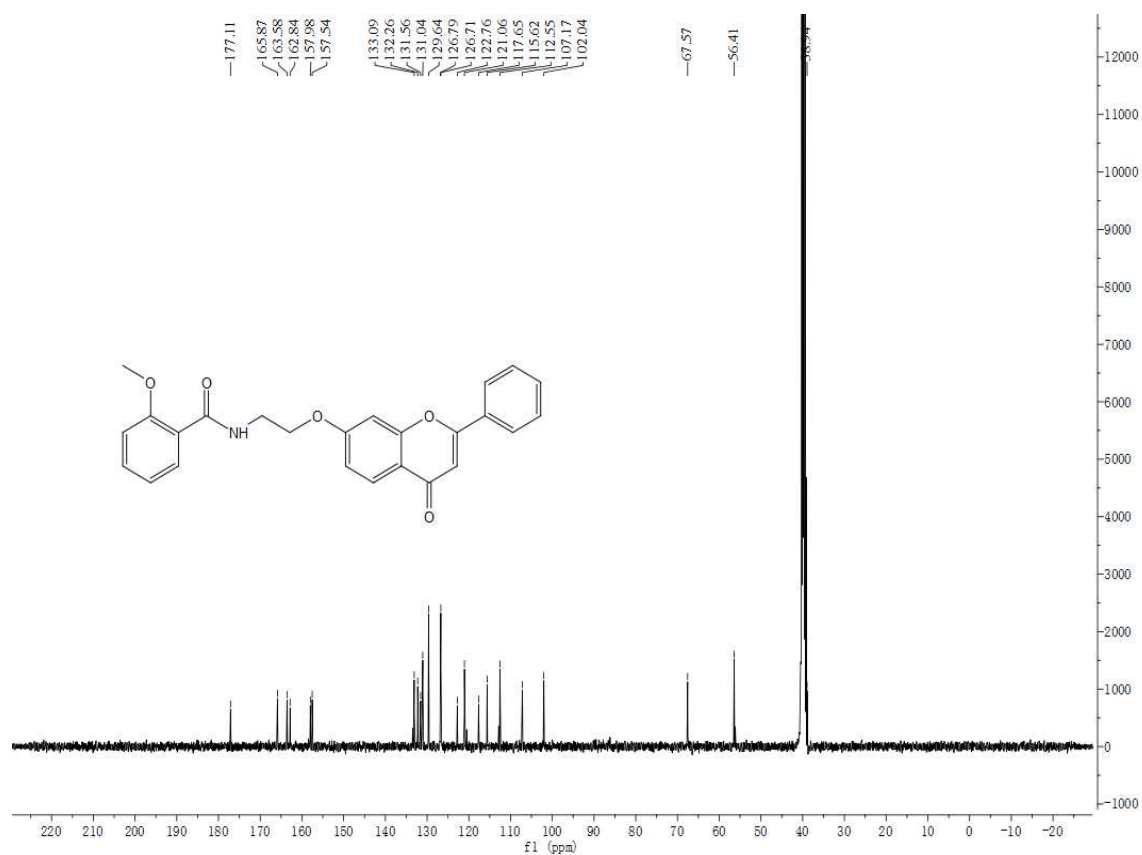Figure S46. <sup>13</sup>C NMR spectrum of **5b**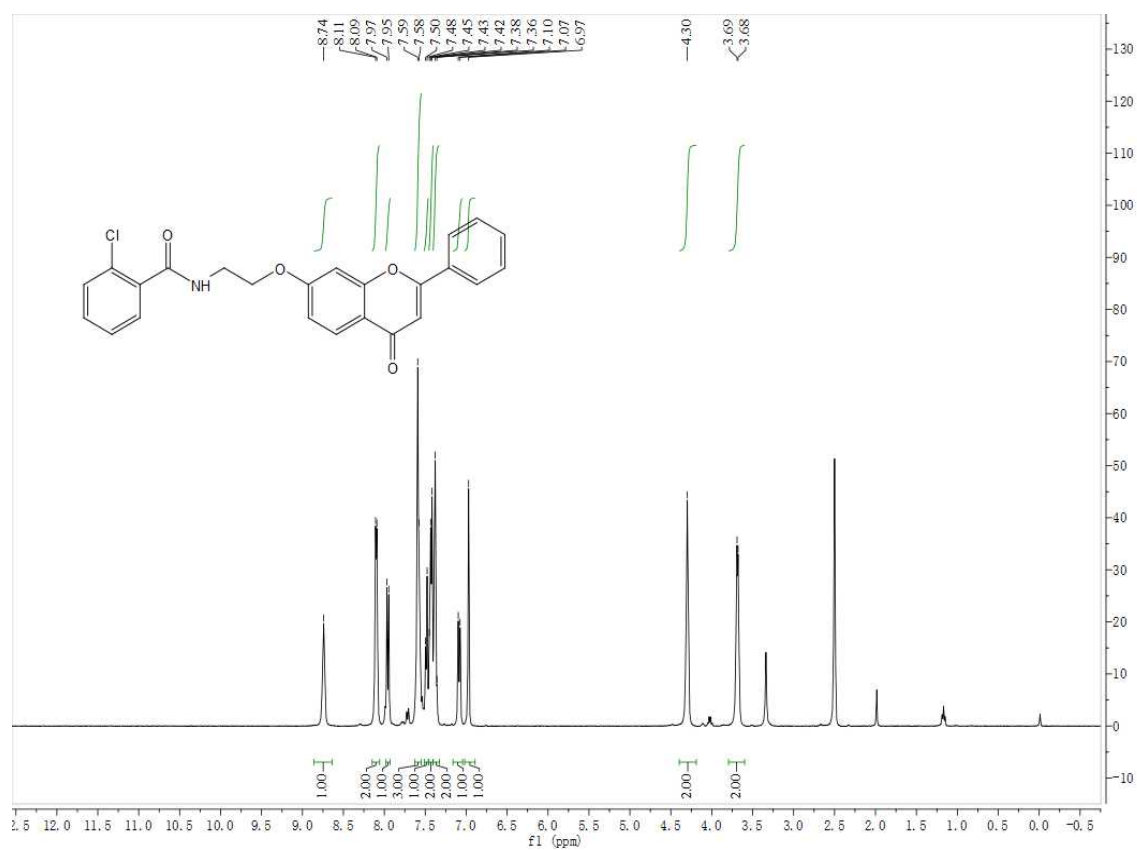Figure S47. <sup>1</sup>H NMR spectrum of **5c**



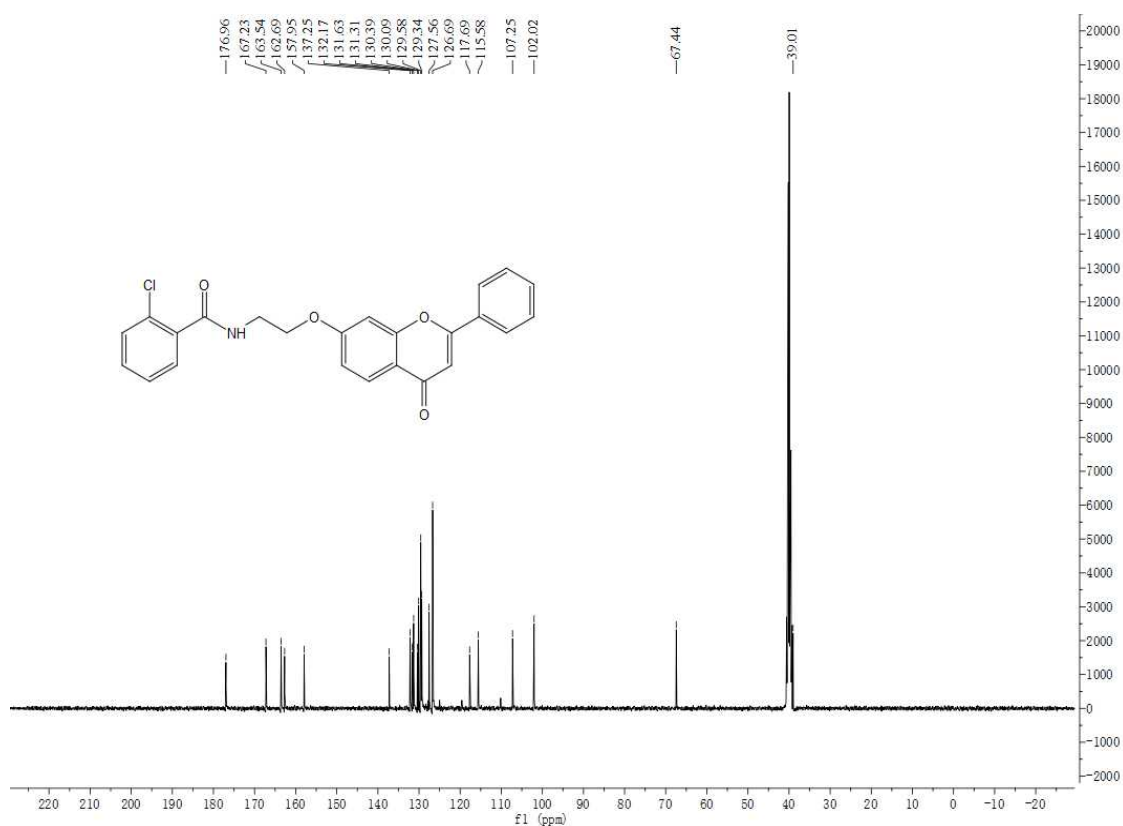Figure S48. <sup>13</sup>C NMR spectrum of 5c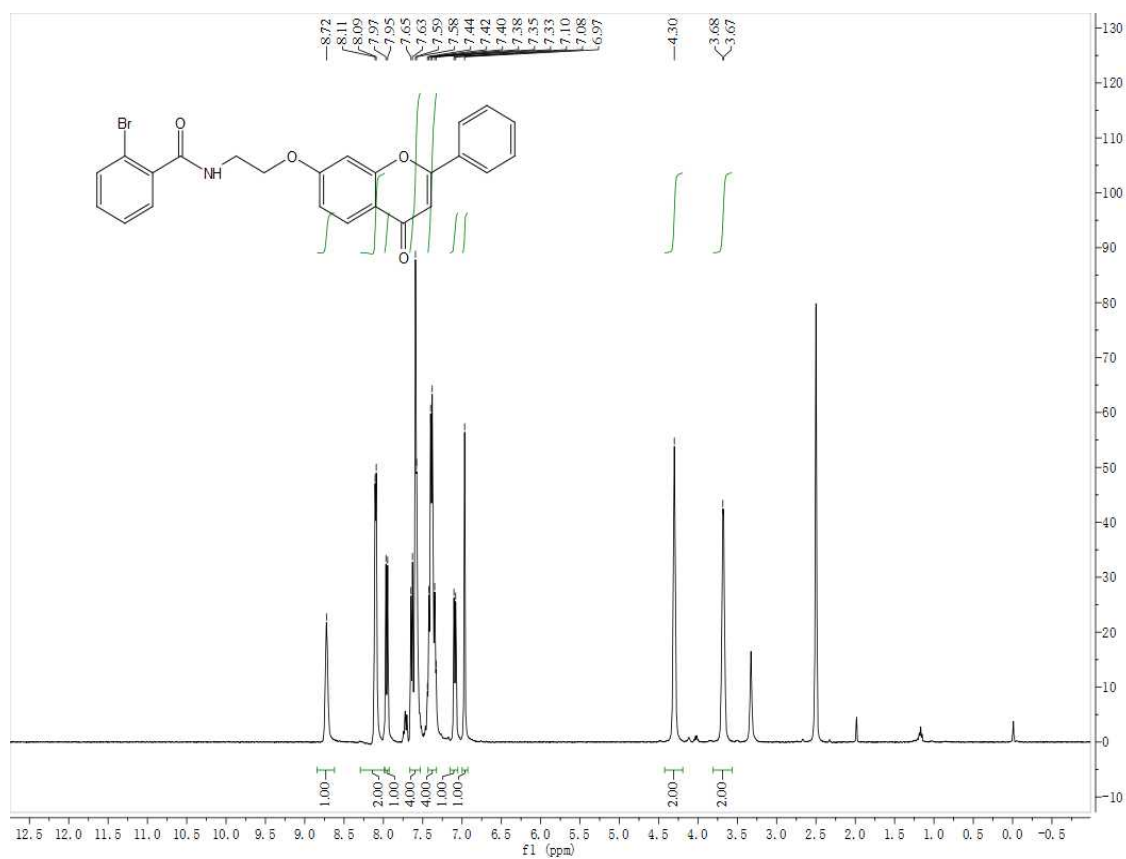Figure S49. <sup>1</sup>H NMR spectrum of 5d

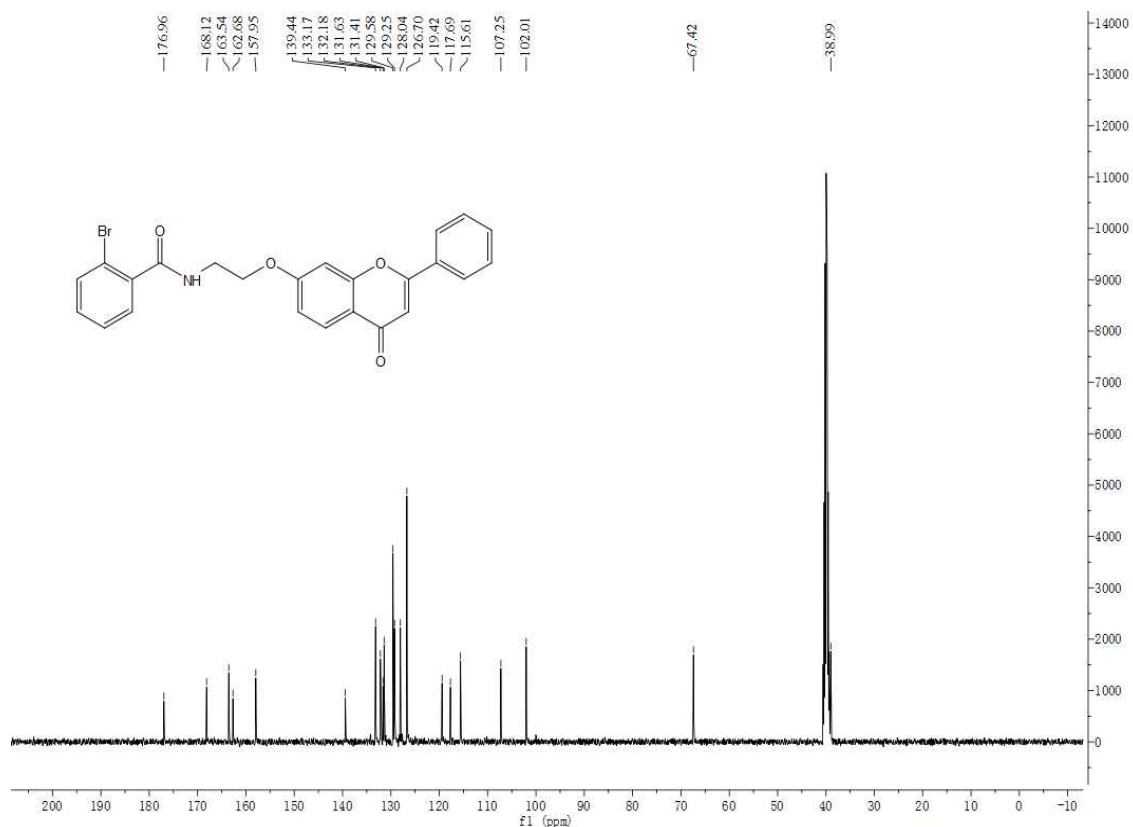

**Figure S50.**  $^{13}\text{C}$  NMR spectrum of **5d**

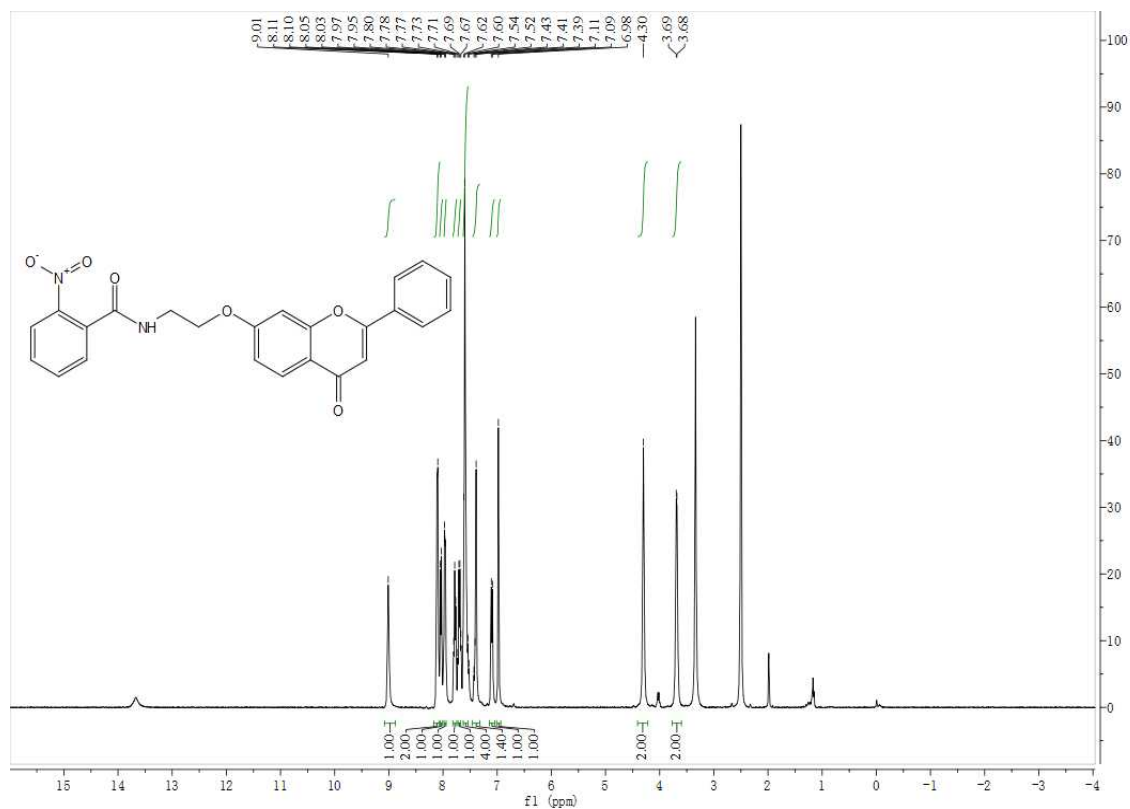

**Figure S51.**  $^1\text{H}$  NMR spectrum of **5e**

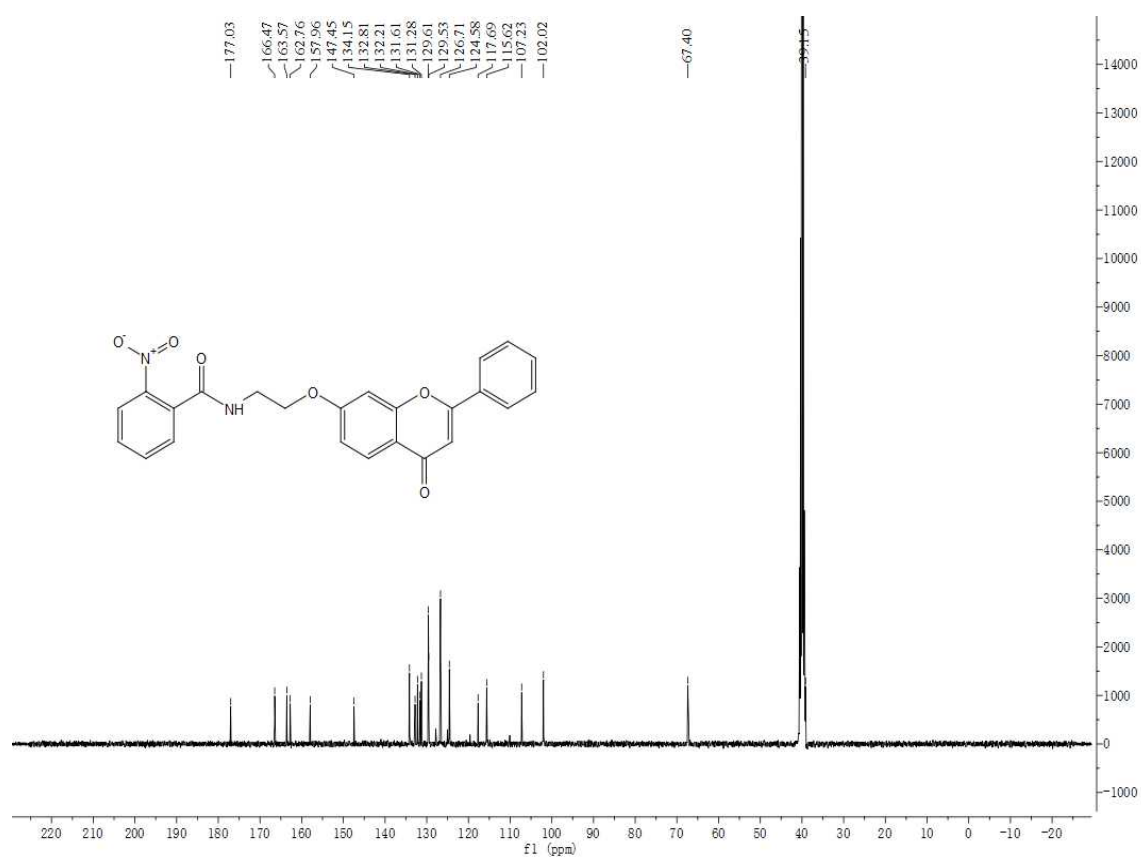Figure S52. <sup>13</sup>C NMR spectrum of 5e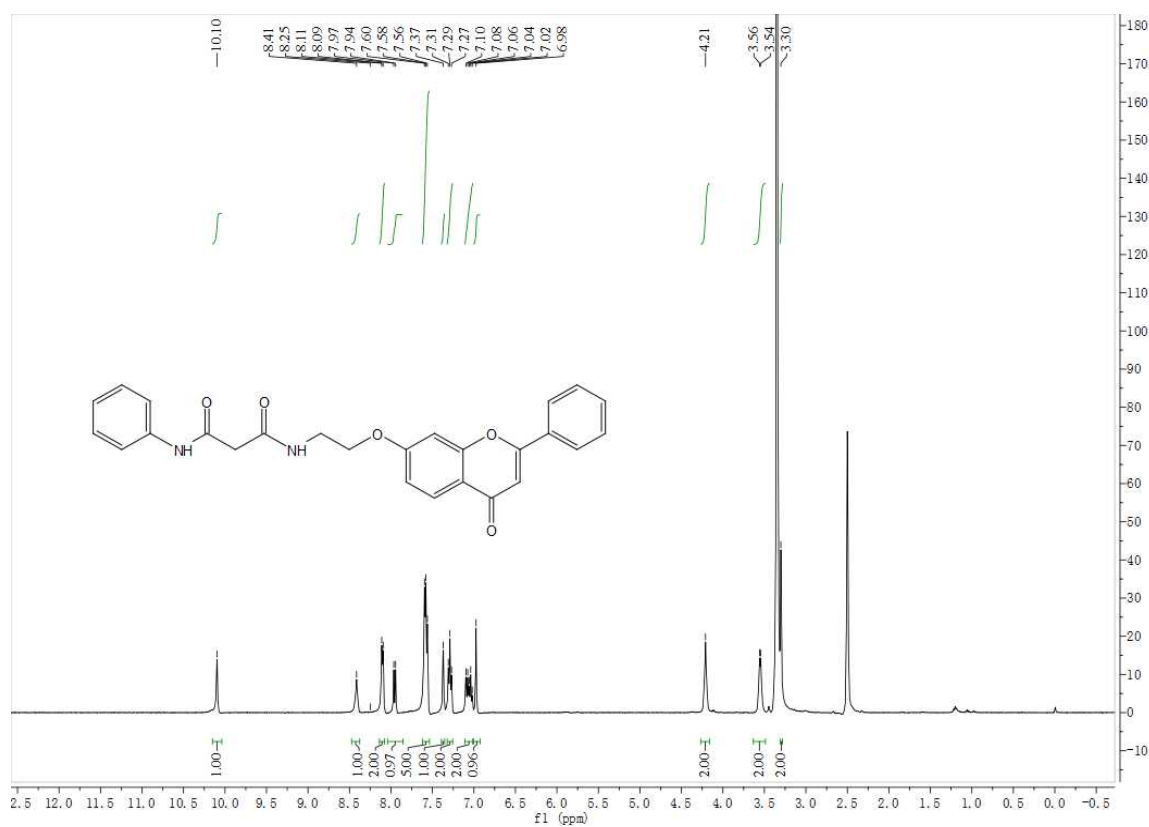Figure S53. <sup>1</sup>H NMR spectrum of 6a

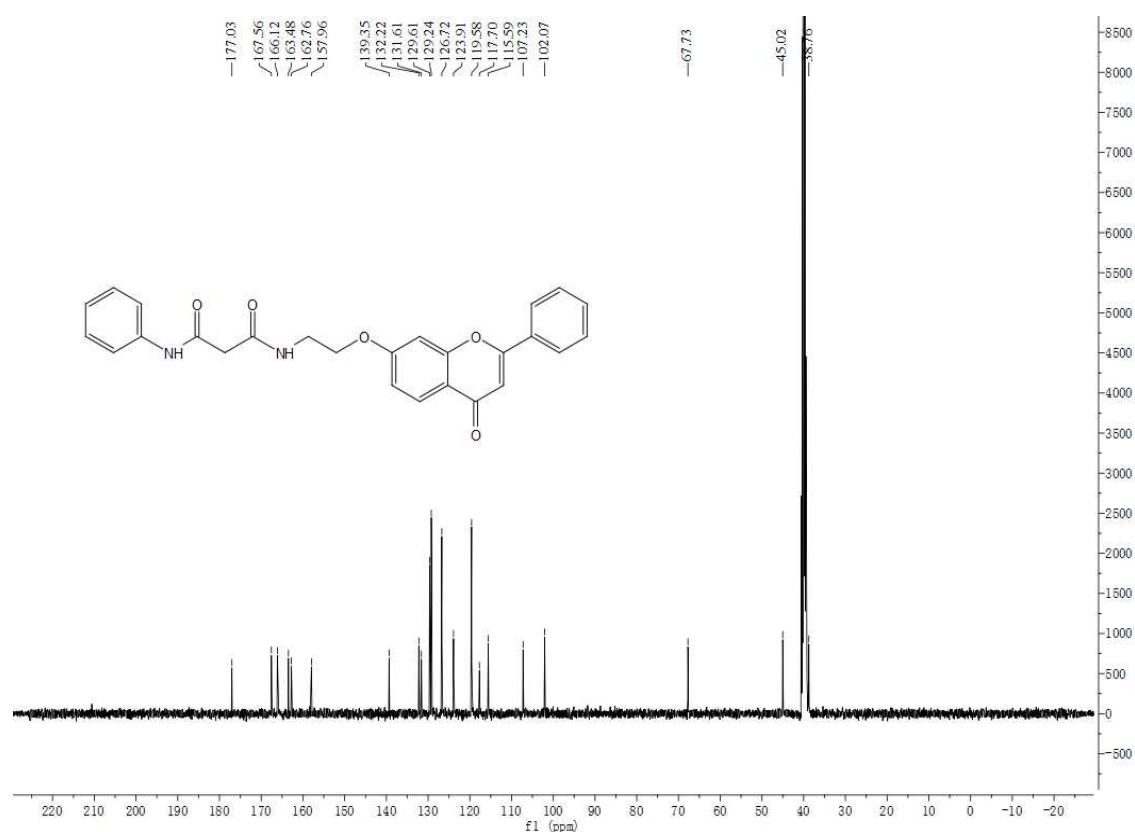Figure S54. <sup>13</sup>C NMR spectrum of 6a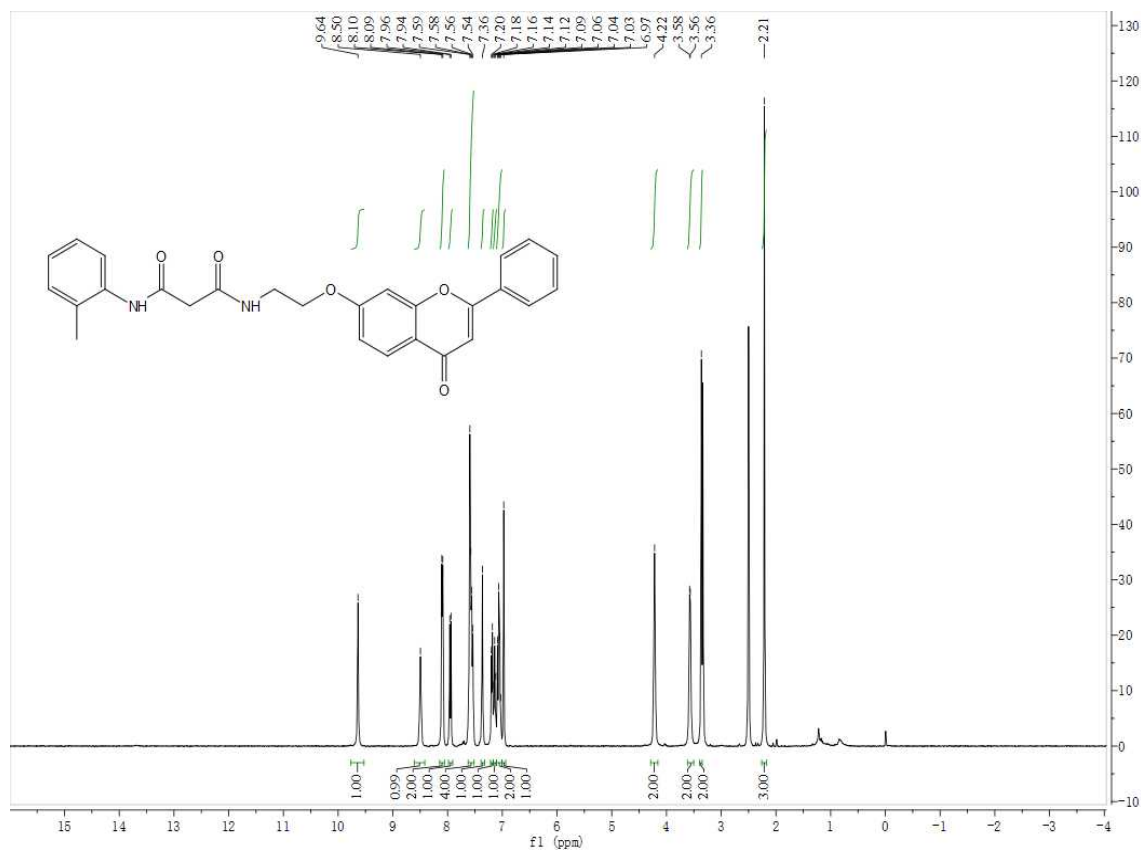Figure S55. <sup>1</sup>H NMR spectrum of 6b

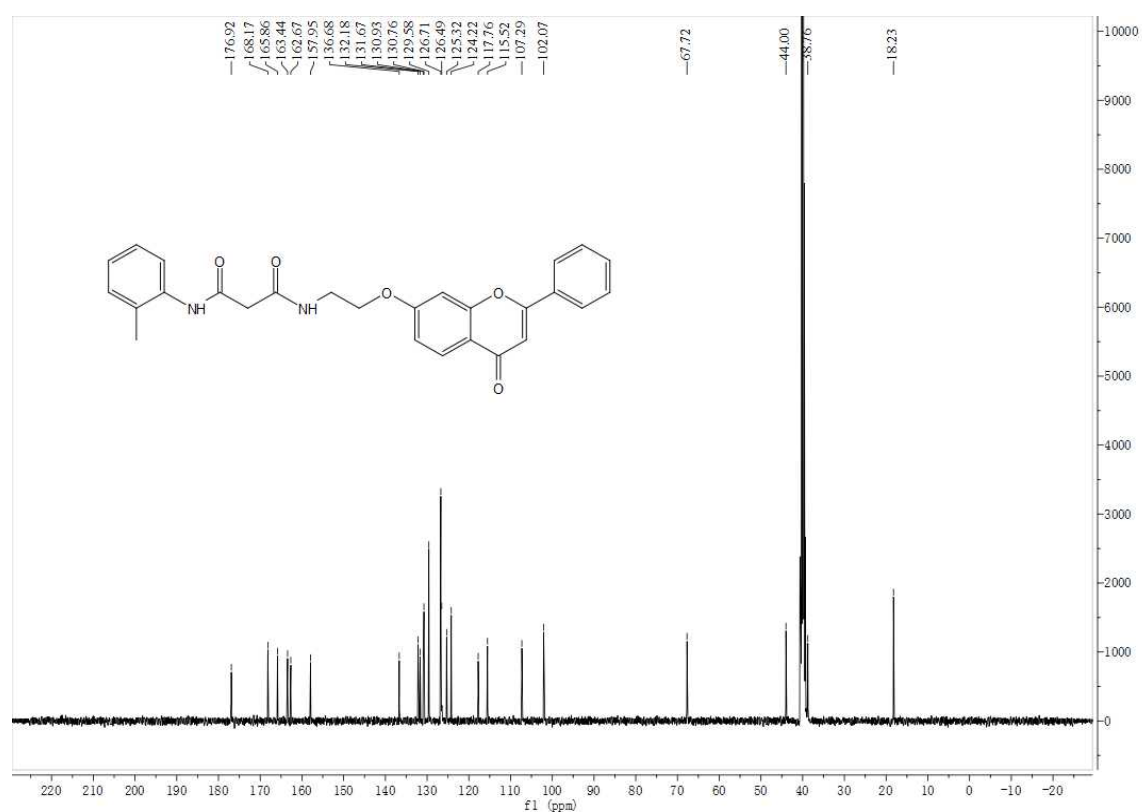Figure S56. <sup>13</sup>C NMR spectrum of **6b**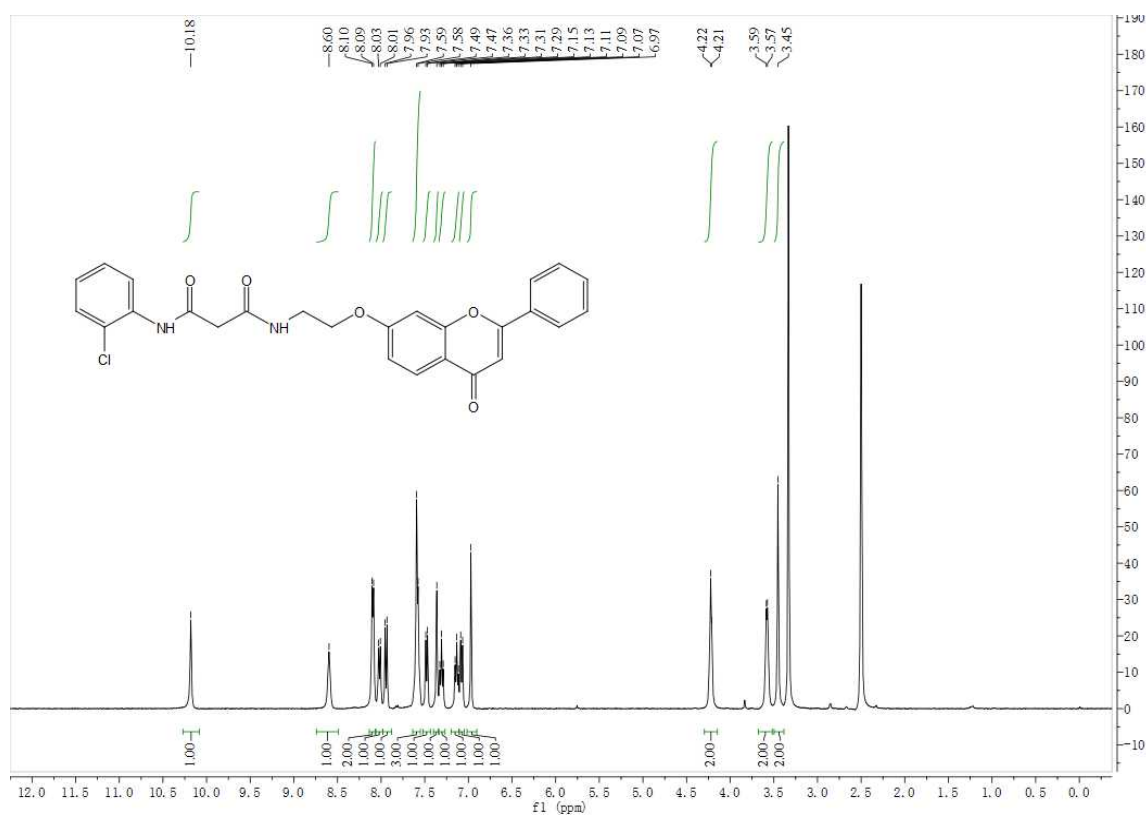Figure S57. <sup>1</sup>H NMR spectrum of **6c**

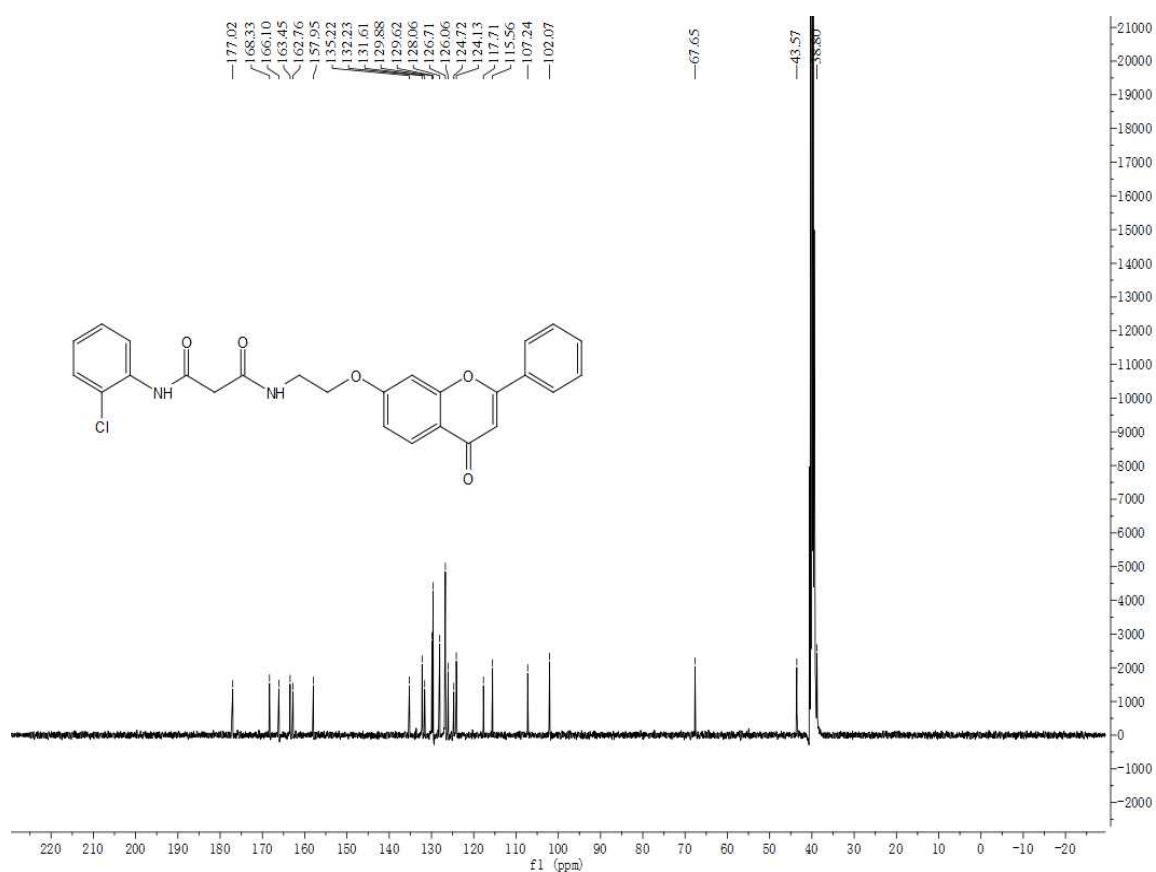Figure S58. <sup>13</sup>C NMR spectrum of 6c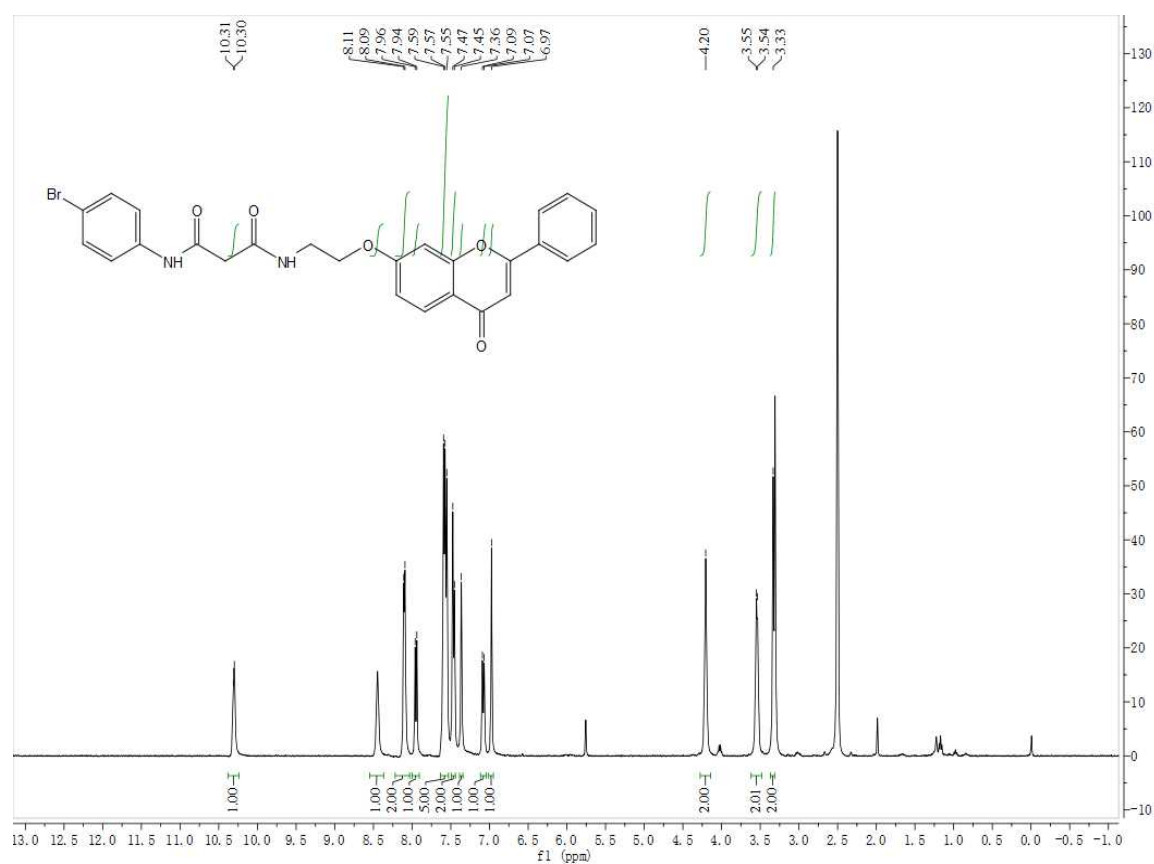

**Figure S59.**  $^1\text{H}$  NMR spectrum of **6d**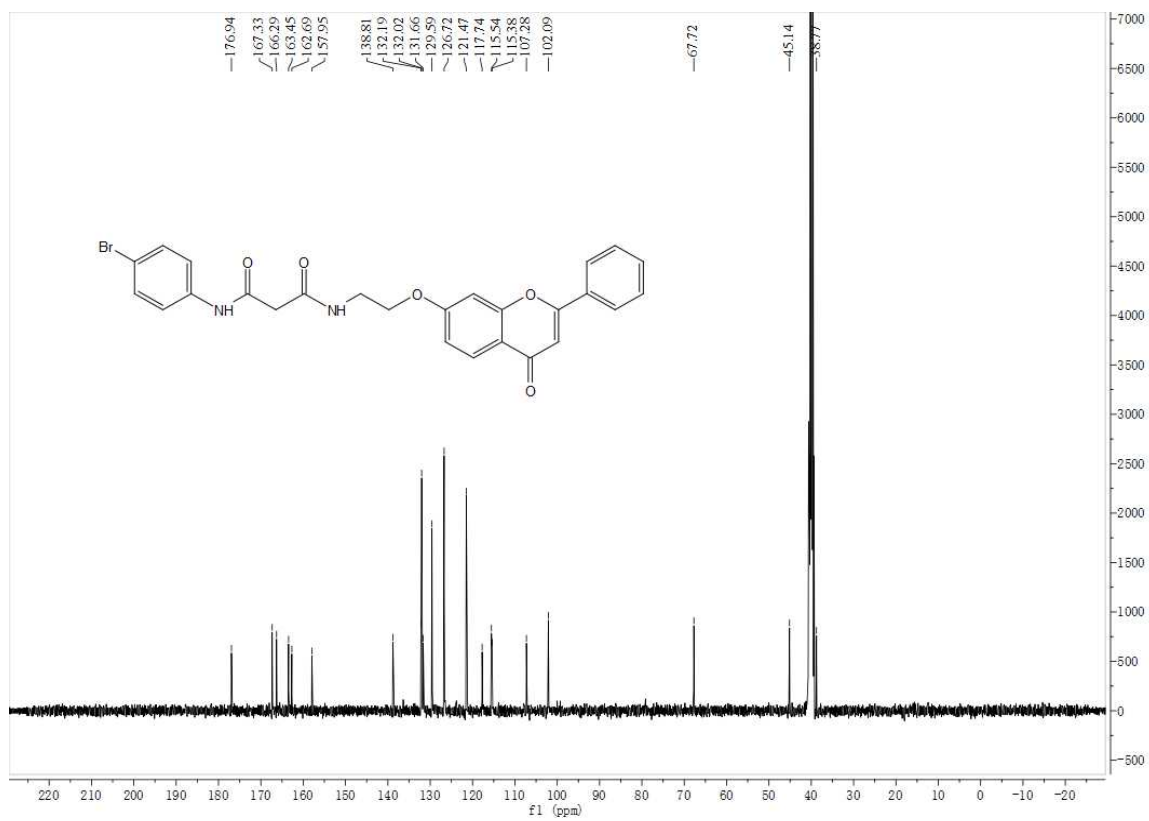**Figure S60.**  $^{13}\text{C}$  NMR spectrum of **6d**

Section S3: Molecule docking results of **1** and **2a** with TMV CP.



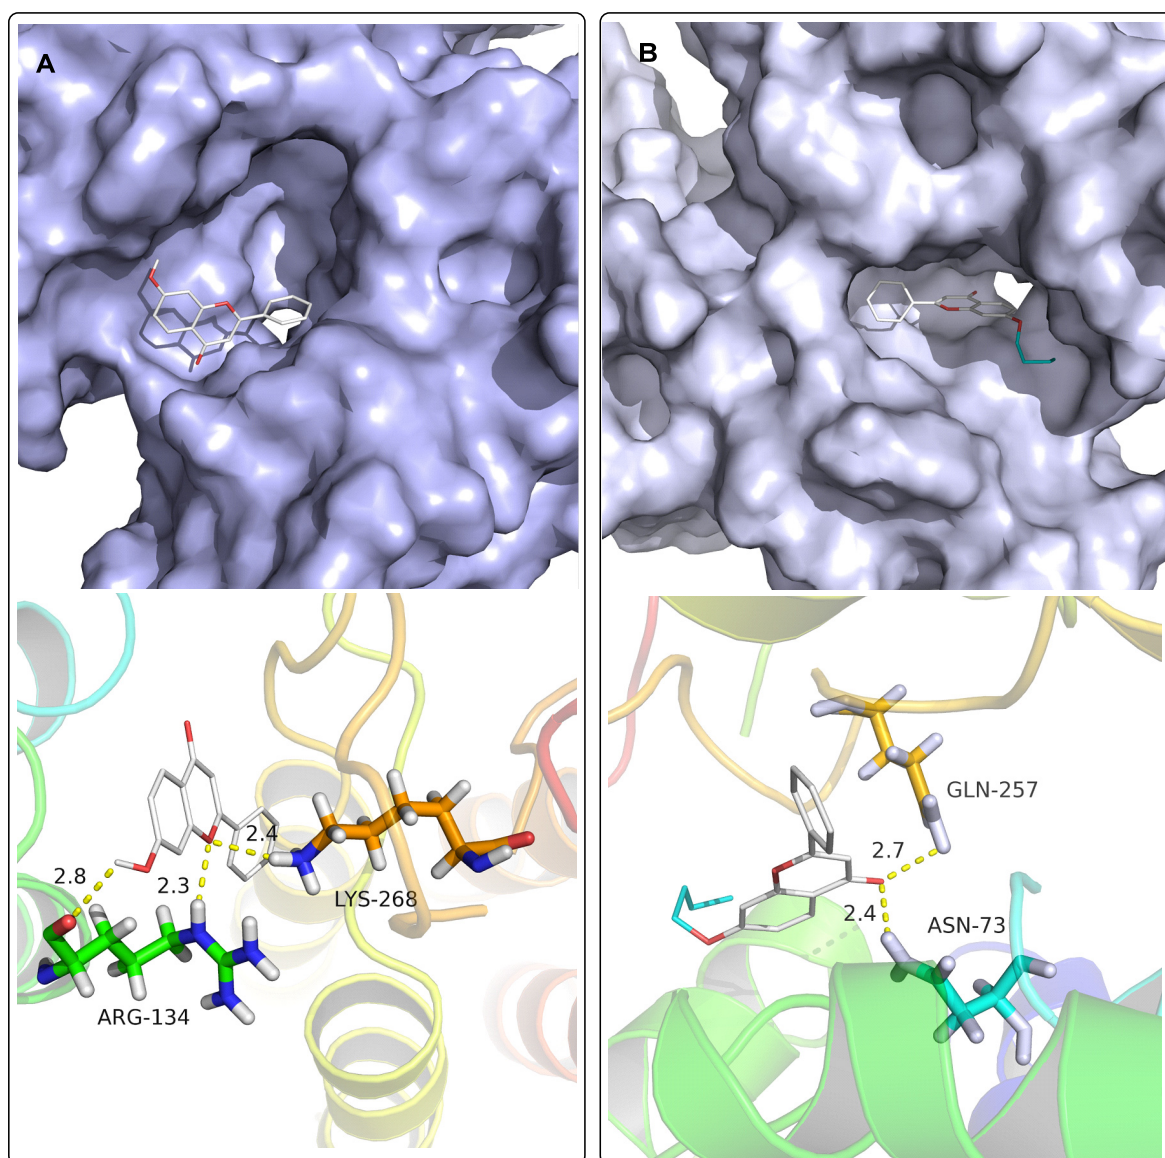

**Figure S61.** Molecule docking results of **1** (A) and **2a** (B) with TMV CP
